# Supplementary material for: Transcriptome and proteome analysis of dogs with precursor targeted immune-mediated anemia treated with splenectomy
Source: PLoS One. 2023 May 5;18(5):e0285415. doi: 10.1371/journal.pone.0285415 (PMC10162568; doi:10.1371/journal.pone.0285415)
Supplement: S2 Table — (XLSX) [file pone.0285415.s002.xlsx]

## Sheet: S2
Ensembl ID	Gene Symbol	Mean Expression	log2 Fold Change	adjusted p value
ENSCAFG00000011677.4	EPB41	86.041	-1.842	4e-38
ENSCAFG00000007478.3	CHMP4B	75.71	-1.587	1.6e-33
ENSCAFG00000006164.4	CYP1B1	315.001	-1.962	1.6e-33
ENSCAFG00000002513.4	TMEM196	24.76	-1.819	2.3e-26
ENSCAFG00000016920.4	ABI3	5.016	-2.166	1.7e-23
ENSCAFG00000010377.4	ENSCAFT00000048356.2	39.118	-1.602	9.1e-23
ENSCAFG00000000364.3	WIF1	4.332	-3.649	2.7e-22
ENSCAFG00000008756.3	ACTG2	19.438	-2.147	6.7e-22
ENSCAFG00000017326.3	CNN1	41.781	-2.102	5.1e-21
ENSCAFG00000018078.4	ENSCAFT00000028730.4	16.386	-3.132	1.4e-20
ENSCAFG00000020357.3	DNAJB4	129.123	-0.924	2.8e-20
ENSCAFG00000009559.4	RCAN1	21.474	-1	1.4e-17
ENSCAFG00000008384.2	SLC38A7	162.884	-0.752	4.4e-17
ENSCAFG00000014469.3	EFHC2	67.066	-1.595	1.1e-15
ENSCAFG00000014742.5	FKBP8	9.341	-1.264	1.3e-15
ENSCAFG00000032756.1	FAM198B	3.778	-2.055	4.4e-15
ENSCAFG00000016966.4	TPM1	122.537	-1.344	4.5e-14
ENSCAFG00000032545.1	PROKR2	207.431	-0.751	1.6e-13
ENSCAFG00000019177.3	SLC1A7	1.857	-1.545	4.3e-13
ENSCAFG00000032615.1	ENSCAFT00000044579.1	10849.8	-4.219	1.1e-12
ENSCAFG00000006607.3	DPYSL3	3.679	-1.58	1.7e-12
ENSCAFG00000014599.3	GOLIM4	28.124	-0.947	2.6e-11
ENSCAFG00000029189.1	TIMP3	139.239	-2.075	3.4e-11
ENSCAFG00000016922.3	PHOSPHO1	1.554	-2.823	5.7e-11
ENSCAFG00000001622.3	TAF8	15.43	-0.843	5.9e-11
ENSCAFG00000017366.4	KANK2	6.916	-0.658	9e-11
ENSCAFG00000023324.2	S100A12	8755.88	4.489	9.6e-11
ENSCAFG00000029227.1	CSRP1	62.712	-1.029	1.5e-10
ENSCAFG00000017557.2	S100A8	8888.91	4.438	2.9e-10
ENSCAFG00000032255.1	RNF175	152.224	-0.774	2.9e-10
ENSCAFG00000013490.4	FAM129A	14.945	-0.927	4.8e-10
ENSCAFG00000029470.1	ENSCAFT00000046021.1	839.681	4.145	6.8e-10
ENSCAFG00000003966.3	ANKRD50	10.199	-0.663	1.1e-09
ENSCAFG00000013763.3	LTF	192.642	4.16	2.3e-09
ENSCAFG00000015708.3	ACTA2	76.222	-1.985	3.5e-09
ENSCAFG00000030286.2	ENSCAFT00000009976.4	51688.7	-3.811	3.5e-09
ENSCAFG00000013367.4	HIP1	2.495	-1.191	4.1e-09
ENSCAFG00000029904.1	ENSCAFT00000045378.1	24918.1	-3.727	5.2e-09
ENSCAFG00000003272.3	ELMO1	8.924	-0.744	5.4e-09
ENSCAFG00000016769.4	NES	12.184	-1.322	6.1e-09
ENSCAFG00000007851.3	HMGB2	327.602	2.28	7.2e-09
ENSCAFG00000016185.4	ENAH	10.231	-1.082	7.2e-09
ENSCAFG00000007492.4	PALLD	23.04	-1.672	8.4e-09
ENSCAFG00000018560.3	MYH11	29.912	-1.904	9.1e-09
ENSCAFG00000007593.4	PAM	10.271	-0.849	1.7e-08
ENSCAFG00000013162.4	TAGLN	113.367	-1.561	1.7e-08
ENSCAFG00000009488.5	MTDH	546.7	1.09	1.8e-08
ENSCAFG00000010936.3	NPNT	4.285	-1.528	1.8e-08
ENSCAFG00000008638.3	ARHGEF26	1.335	-1.991	1.8e-08
ENSCAFG00000010730.3	NFKB1	17.272	-0.547	2.2e-08
ENSCAFG00000010815.4	TGFB2	2.233	-1.499	2.3e-08
ENSCAFG00000013655.3	HMCN1	1.85	-1.093	3.6e-08
ENSCAFG00000032562.1	CFL2	4.983	-0.819	4e-08
ENSCAFG00000006047.4	LETM2	8.213	-0.736	4.8e-08
ENSCAFG00000030619.1	DSTN	56.182	-1.471	5.2e-08
ENSCAFG00000031727.1	STC2	4.938	-1.228	5.7e-08
ENSCAFG00000000561.4	MIOX	106.304	-3.421	9e-08
ENSCAFG00000012057.4	EIF3A	126.761	0.913	1e-07
ENSCAFG00000020104.4	CNN3	69.435	-0.569	1e-07
ENSCAFG00000013852.4	MATN2	3.678	-1.156	1e-07
ENSCAFG00000010090.4	IGF2	113.224	-1.374	1.4e-07
ENSCAFG00000004656.4	ITGA8	10.366	-1.179	1.6e-07
ENSCAFG00000020353.5	NEXN	59.828	-1.848	1.6e-07
ENSCAFG00000008343.3	TM4SF1	48.605	-0.976	1.8e-07
ENSCAFG00000008540.3	MYL9	113.26	-1.313	1.8e-07
ENSCAFG00000012414.3	FAM13C	4.057	-1.206	2.1e-07
ENSCAFG00000028879.1	CAVIN1	29.709	-0.61	2.4e-07
ENSCAFG00000016342.3	PCDH7	8.233	-1.19	3.4e-07
ENSCAFG00000008253.3	ACTA1	3.334	-1.345	4e-07
ENSCAFG00000002086.4	TPM2	178.095	-1.685	4.3e-07
ENSCAFG00000003776.3	NRP1	15.329	-0.611	5.2e-07
ENSCAFG00000012119.4	MYLK	21.493	-0.894	5.5e-07
ENSCAFG00000020287.3	SYDE2	2.095	-1.135	5.8e-07
ENSCAFG00000006593.3	CBX5	227.339	1.641	7.3e-07
ENSCAFG00000029740.1	MSRB3	18.426	-1.078	7.7e-07
ENSCAFG00000029146.1	PPP1R3C	4.776	-1.304	7.7e-07
ENSCAFG00000012528.3	PSMA7	609.244	1.054	8.7e-07
ENSCAFG00000018439.4	ITGA1	18.247	-1.025	8.7e-07
ENSCAFG00000006388.3	NTN4	16.117	-0.751	1e-06
ENSCAFG00000018591.3	ARHGAP28	3.27	-0.688	1.2e-06
ENSCAFG00000001211.2	HMGA1	47.219	2.97	1.5e-06
ENSCAFG00000005886.3	CRIM1	11.386	-0.993	1.7e-06
ENSCAFG00000020290.4	DAB2IP	2.153	-1.056	1.7e-06
ENSCAFG00000012762.3	COCH	25.694	-2.056	1.7e-06
ENSCAFG00000011656.2	ENSCAFT00000018493.2	13.921	-1.172	2e-06
ENSCAFG00000008395.3	SCARA3	2.536	-0.986	2.1e-06
ENSCAFG00000012424.4	SYNPO2	5.518	-1.27	2.1e-06
ENSCAFG00000008647.3	TKT	136.312	1.723	2.2e-06
ENSCAFG00000011037.4	NCL	195.083	1.009	2.3e-06
ENSCAFG00000017411.3	EPOR	10.474	3.362	2.6e-06
ENSCAFG00000002110.3	PPP1R9A	4.055	-0.857	2.8e-06
ENSCAFG00000001883.3	GABRA1	0.478	-1.342	2.9e-06
ENSCAFG00000005412.3	FBL	94.427	1.397	3e-06
ENSCAFG00000018201.4	RIOK3	11.985	-0.741	3.1e-06
ENSCAFG00000009242.4	FILIP1L	38.111	-0.817	3.5e-06
ENSCAFG00000013237.4	SH3GL3	7.785	-1.119	3.5e-06
ENSCAFG00000032259.1	ENSCAFT00000048639.1	485.142	4.51	3.6e-06
ENSCAFG00000004793.4	LRRFIP2	27.935	-0.757	3.7e-06
ENSCAFG00000002079.3	KDR	4.593	-0.817	3.7e-06
ENSCAFG00000003169.5	CALD1	86.249	-1.102	3.7e-06
ENSCAFG00000004521.4	FGD5	5.127	-1.339	3.7e-06
ENSCAFG00000029950.1	PKIB	15.356	-1.555	3.9e-06
ENSCAFG00000017883.4	NRK	0.309	-1.087	4.2e-06
ENSCAFG00000000593.4	LMNB1	51.334	1.943	4.6e-06
ENSCAFG00000029568.1	ENSCAFT00000022855.3	25.917	-3.186	5e-06
ENSCAFG00000024748.3	CD55	13.257	2.928	5.3e-06
ENSCAFG00000005776.4	ACTN4	98.25	-0.368	5.9e-06
ENSCAFG00000012975.4	MAP4	8.915	-0.565	5.9e-06
ENSCAFG00000029153.1	PEG3	4.749	-0.837	5.9e-06
ENSCAFG00000019901.3	SLC7A5	8.083	2.395	6.1e-06
ENSCAFG00000008311.3	ENSCAFT00000013190.3	933.315	1.237	6.8e-06
ENSCAFG00000011172.4	FSTL1	53.893	-0.662	6.8e-06
ENSCAFG00000031068.1	ENSCAFT00000047202.1	46.839	-0.491	7.7e-06
ENSCAFG00000012694.5	ANK3	2.621	-0.847	7.7e-06
ENSCAFG00000007743.2	ENSCAFT00000012389.2	340.539	1.569	7.8e-06
ENSCAFG00000001143.3	MCHR1	4.039	-1.912	7.8e-06
ENSCAFG00000002657.4	TTYH1	1.634	-1.821	8.2e-06
ENSCAFG00000006722.4	MAGI1	1.895	-1.673	8.8e-06
ENSCAFG00000018230.3	IL13RA2	23.734	-0.642	9.8e-06
ENSCAFG00000018683.4	MTCL1	3.415	-0.76	1e-05
ENSCAFG00000015475.3	DES	5.89	-1.049	1e-05
ENSCAFG00000032716.1	EMCN	1.973	-1.157	1.1e-05
ENSCAFG00000009058.3	TOP1	185.161	1.095	1.2e-05
ENSCAFG00000019688.3	RERE	11.573	-0.433	1.2e-05
ENSCAFG00000003600.3	BVES	0.476	-1.179	1.2e-05
ENSCAFG00000011433.3	CEBPE	9.56	3.641	1.3e-05
ENSCAFG00000005204.3	CTNNB1	18.64	-0.41	1.3e-05
ENSCAFG00000004857.2	ENSCAFT00000007830.2	21.186	-5.795	1.4e-05
ENSCAFG00000003748.3	GEN1	6.309	1.786	1.5e-05
ENSCAFG00000010497.4	PPP1R12B	7.912	-0.904	1.6e-05
ENSCAFG00000029191.1	STMN1	70.621	1.901	1.7e-05
ENSCAFG00000015412.4	NKX3-2	4.354	-1.367	1.7e-05
ENSCAFG00000013431.4	WDR76	8.149	2.134	1.8e-05
ENSCAFG00000008668.3	SEPT11	53.913	-0.611	1.8e-05
ENSCAFG00000029135.1	GDNF	0.758	-1.118	1.8e-05
ENSCAFG00000030164.1	ENSCAFT00000043979.1	1052.93	1.654	2.2e-05
ENSCAFG00000005523.4	MBNL2	3.536	-0.823	2.2e-05
ENSCAFG00000018701.3	ENSCAFT00000029694.3	338.387	1.581	2.4e-05
ENSCAFG00000002413.4	DST	10.369	-0.825	2.4e-05
ENSCAFG00000009469.4	NKX2-3	6.356	-1.39	2.4e-05
ENSCAFG00000014333.3	S100P	1297.35	2.827	2.5e-05
ENSCAFG00000020116.3	ARHGAP29	13.583	-0.775	2.7e-05
ENSCAFG00000009537.4	SPARCL1	107.495	-1.045	2.8e-05
ENSCAFG00000007475.5	SORBS2	21.638	-1.191	2.9e-05
ENSCAFG00000018864.3	GPC3	3.156	-1.569	3.2e-05
ENSCAFG00000011005.5	TCF7L2	102.699	-0.59	3.3e-05
ENSCAFG00000010892.3	KCTD10	8.573	-0.792	3.3e-05
ENSCAFG00000010885.2	TPPP	0.69	-0.672	3.4e-05
ENSCAFG00000001336.3	ISCA1	72.811	-1.076	3.4e-05
ENSCAFG00000012448.3	NOP58	57.604	1.135	3.6e-05
ENSCAFG00000011207.3	DAG1	5.321	-0.552	3.6e-05
ENSCAFG00000013957.2	TSPAN15	1.936	-1.72	3.7e-05
ENSCAFG00000015819.3	SYNE2	9.263	-0.558	3.8e-05
ENSCAFG00000006091.3	KITLG	5.065	-1.064	3.8e-05
ENSCAFG00000029230.1	GP1BB	55.801	3.124	4e-05
ENSCAFG00000000446.4	PTPRB	2.111	-0.965	4.2e-05
ENSCAFG00000018625.4	C3	44.233	2.22	5e-05
ENSCAFG00000003403.3	PDIA4	49.266	1.626	5e-05
ENSCAFG00000003278.3	CDCA8	17.997	3.08	5.2e-05
ENSCAFG00000030640.1	PID1	4.073	-0.722	5.2e-05
ENSCAFG00000008433.4	ENSCAFT00000048334.2	8.863	-1.301	5.2e-05
ENSCAFG00000014195.4	IQCJ-SCHIP1	4.321	-1.416	5.2e-05
ENSCAFG00000031455.1	GABARAPL2	22.186	-0.331	5.3e-05
ENSCAFG00000015209.3	TUBA4A	106.613	2.672	5.6e-05
ENSCAFG00000029379.1	UBE2S	41.054	2.39	6.1e-05
ENSCAFG00000010833.3	NKD2	1.15	-1.522	6.1e-05
ENSCAFG00000007026.4	CXCL12	1549.36	-2.097	6.1e-05
ENSCAFG00000004736.3	BEND7	10.707	-0.555	6.2e-05
ENSCAFG00000018857.3	GPC4	0.908	-0.911	6.5e-05
ENSCAFG00000014924.3	MYOC	6.386	-3.487	6.9e-05
ENSCAFG00000008270.3	SORBS1	1.835	-1.062	7e-05
ENSCAFG00000014823.3	PRKCI	3.097	-0.85	7.2e-05
ENSCAFG00000019242.3	PNCK	2.262	-1.662	7.3e-05
ENSCAFG00000000992.4	ATAD2	11.718	1.848	7.4e-05
ENSCAFG00000004093.3	MGLL	9.806	-0.835	7.6e-05
ENSCAFG00000024988.2	FRZB	11.962	-1.214	7.8e-05
ENSCAFG00000008442.3	ANAPC7	3.941	1.428	8e-05
ENSCAFG00000004474.3	CACNB2	1.46	-1.573	8.3e-05
ENSCAFG00000006521.3	FRMD4B	3.115	-0.57	8.5e-05
ENSCAFG00000007242.4	CKAP2L	20.268	2.57	8.6e-05
ENSCAFG00000001829.3	SRF	23.525	-0.5	8.9e-05
ENSCAFG00000010154.3	MYH15	0.375	-0.68	9.1e-05
ENSCAFG00000000345.4	SRGAP1	7.063	-1.085	9.2e-05
ENSCAFG00000019575.3	EGFL7	26.731	-0.597	9.9e-05
ENSCAFG00000001875.4	CKAP4	44.185	1.962	0.0001
ENSCAFG00000010572.4	U2AF1L5	432.864	0.82	0.0001
ENSCAFG00000002941.4	ME1	5.621	-0.509	0.0001
ENSCAFG00000029034.1	PDLIM3	13.298	-0.728	0.0001
ENSCAFG00000009977.4	CAP2	2.133	-0.853	0.0001
ENSCAFG00000031728.1	YAP1	14.681	-0.874	0.0001
ENSCAFG00000005970.3	FGFR1	18.489	-0.893	0.0001
ENSCAFG00000003402.4	CAV2	10.071	-1.066	0.0001
ENSCAFG00000012286.4	STRADB	4.502	-1.303	0.0001
ENSCAFG00000017008.3	AURKB	196.427	2.75	0.00011
ENSCAFG00000006383.3	BRCA2	5.611	1.914	0.00011
ENSCAFG00000010865.3	ENSCAFT00000017296.3	66.601	1.63	0.00011
ENSCAFG00000030440.1	NOV	1.136	-1.139	0.00011
ENSCAFG00000010529.4	PCSK6	1.234	-1.39	0.00011
ENSCAFG00000009538.3	NUSAP1	28.367	2.733	0.00012
ENSCAFG00000011899.4	HJURP	8.137	2.395	0.00012
ENSCAFG00000025057.2	LAMB1	6.623	-0.436	0.00012
ENSCAFG00000015345.3	CC2D2A	3.453	-0.703	0.00012
ENSCAFG00000005760.4	PLCB4	4.371	-1.087	0.00012
ENSCAFG00000029937.1	EFHD1	72.691	-1.35	0.00012
ENSCAFG00000024864.4	ENSCAFT00000038439.4	4.364	-1.888	0.00012
ENSCAFG00000008369.3	ENSCAFT00000013295.3	8.53	2.875	0.00013
ENSCAFG00000014595.3	PYGL	2.737	1.418	0.00013
ENSCAFG00000025045.2	HNRNPD	87.305	0.879	0.00013
ENSCAFG00000009104.3	STC1	30.143	-0.264	0.00013
ENSCAFG00000000250.3	ARHGEF25	2.321	-1.024	0.00013
ENSCAFG00000008791.3	NPY1R	8.014	-1.402	0.00013
ENSCAFG00000010084.4	CCT5	52.931	1.228	0.00014
ENSCAFG00000011080.4	CD99	44.149	-0.253	0.00014
ENSCAFG00000017094.3	ZNF609	13.655	-0.492	0.00014
ENSCAFG00000012489.3	CASTOR1	4.224	-0.632	0.00014
ENSCAFG00000003243.3	ANLN	4.419	1.773	0.00015
ENSCAFG00000012760.3	ABRAXAS2	9.651	1.643	0.00015
ENSCAFG00000011401.3	KIRREL1	2.562	-0.752	0.00015
ENSCAFG00000008618.3	DSN1	5.962	2.424	0.00016
ENSCAFG00000016090.4	TOP2A	48.349	2.4	0.00016
ENSCAFG00000018530.4	MAP2K3	24.541	1.381	0.00016
ENSCAFG00000017408.3	GTF3C1	7.349	-0.244	0.00016
ENSCAFG00000001152.4	FAM13B	17.736	-0.39	0.00016
ENSCAFG00000024259.3	ENSCAFT00000048435.2	1.598	-1.383	0.00016
ENSCAFG00000029836.1	CENPW	33.184	2.759	0.00017
ENSCAFG00000011598.3	ENSCAFT00000018435.3	8.863	2.228	0.00017
ENSCAFG00000003885.3	SSBP1	25.536	2.115	0.00017
ENSCAFG00000011919.3	CHEK2	3.702	1.832	0.00017
ENSCAFG00000008221.4	ENSCAFT00000036202.3	69.577	1.354	0.00017
ENSCAFG00000007152.6	PTPRG	2.37	-0.773	0.00017
ENSCAFG00000007891.3	HPGD	6.097	-0.837	0.00017
ENSCAFG00000003297.3	LRRN3	0.662	-1.472	0.00017
ENSCAFG00000019921.3	COX4I1	364.938	1.234	0.00018
ENSCAFG00000016587.3	PSMB3	179.175	1.163	0.00018
ENSCAFG00000005101.4	RPSA	867.832	0.91	0.00018
ENSCAFG00000020340.4	ADGRL4	2.616	-0.935	0.00018
ENSCAFG00000014986.3	FMO2	5.582	2.945	0.00019
ENSCAFG00000002731.3	RAPGEF5	30.572	-1.164	0.00019
ENSCAFG00000029884.1	ENSCAFT00000048473.1	225.442	0.887	0.0002
ENSCAFG00000007273.3	FAT1	0.665	-0.655	0.0002
ENSCAFG00000032746.1	MXD1	21.682	1.641	0.00021
ENSCAFG00000000377.1	ENSCAFT00000000591.1	2044.81	1.078	0.00021
ENSCAFG00000016943.3	CD2BP2	13.615	0.996	0.00021
ENSCAFG00000019838.3	RXRA	11.27	-0.475	0.00021
ENSCAFG00000003426.4	TNC	0.28	-0.597	0.00021
ENSCAFG00000007986.3	ZNF366	4.757	-0.805	0.00021
ENSCAFG00000031264.1	CYYR1	7.626	-0.843	0.00021
ENSCAFG00000018250.3	PLS3	4.655	-0.903	0.00021
ENSCAFG00000007923.2	MSC	6.058	-1.231	0.00021
ENSCAFG00000017192.4	HMMR	31.638	2.092	0.00022
ENSCAFG00000025347.2	SPCS3	196.452	1.702	0.00022
ENSCAFG00000009031.4	CMYA5	0.699	-0.725	0.00022
ENSCAFG00000005288.3	TIE1	6.813	-0.914	0.00022
ENSCAFG00000005570.3	LMCD1	3.25	-1.426	0.00022
ENSCAFG00000000636.5	VARS	13.048	1.153	0.00023
ENSCAFG00000032596.1	PTMA	4628.23	0.828	0.00023
ENSCAFG00000005965.4	FOXO1	6.197	-0.814	0.00023
ENSCAFG00000013600.3	PTH1R	1.347	-1.173	0.00023
ENSCAFG00000017981.3	SCAMP5	2.567	-0.94	0.00024
ENSCAFG00000008962.4	CDCA2	7.473	2.238	0.00025
ENSCAFG00000011666.3	ENSCAFT00000018533.3	41.453	1.435	0.00025
ENSCAFG00000015278.4	NTF3	6.396	-1.838	0.00025
ENSCAFG00000032191.2	MAP1A	2.086	-0.546	0.00026
ENSCAFG00000000206.3	CDO1	4.138	-1.57	0.00026
ENSCAFG00000014061.4	DIXDC1	7.381	-0.999	0.00027
ENSCAFG00000003165.3	BPGM	2.393	-1.443	0.00027
ENSCAFG00000017772.3	C9H17orf64	15.078	3.51	0.00028
ENSCAFG00000014178.4	RANBP1	296.265	1.434	0.00029
ENSCAFG00000007870.3	DCLK2	1.801	-0.784	0.00029
ENSCAFG00000000192.3	SEMA6A	8.617	-0.86	0.00029
ENSCAFG00000002894.5	AKAP2	9.798	-0.925	0.00029
ENSCAFG00000000419.3	AKAP12	29.353	-1.01	0.00029
ENSCAFG00000003344.4	WHRN	0.93	-1.072	0.00029
ENSCAFG00000012896.2	CAMP	1552.79	4.897	0.0003
ENSCAFG00000029509.1	ENSCAFT00000046400.1	10.629	2.874	0.0003
ENSCAFG00000012593.3	ENSCAFT00000020009.3	21.807	2.492	0.0003
ENSCAFG00000013917.4	HK1	25.29	1.719	0.0003
ENSCAFG00000018035.3	SNUPN	27.119	1.381	0.0003
ENSCAFG00000017779.4	NEO1	2.089	-0.688	0.0003
ENSCAFG00000010589.3	FGD4	12.606	-0.74	0.0003
ENSCAFG00000008436.4	ERICH6	19.933	-0.994	0.0003
ENSCAFG00000006128.3	SEMA3D	15.138	-1.043	0.0003
ENSCAFG00000013259.3	NUF2	13.862	2.716	0.00031
ENSCAFG00000023380.3	DTX3	27.137	-0.506	0.00031
ENSCAFG00000007950.3	MAP1B	3.393	-0.765	0.00031
ENSCAFG00000005468.4	PFKP	10.623	1.71	0.00032
ENSCAFG00000015077.3	GAPDH	42.172	1.715	0.00033
ENSCAFG00000006538.4	HSPH1	23.654	1.54	0.00033
ENSCAFG00000030033.1	ERP29	29.241	1.222	0.00033
ENSCAFG00000014941.3	ENSCAFT00000045849.1	1.433	-1.42	0.00033
ENSCAFG00000030699.1	ZNF593	8.446	1.601	0.00034
ENSCAFG00000015124.3	NCAPD2	9.506	1.747	0.00035
ENSCAFG00000023267.2	PRIM2	6.821	2.178	0.00037
ENSCAFG00000005718.3	E2F7	4.659	2.095	0.00037
ENSCAFG00000012418.3	SSB	174.499	1.015	0.00038
ENSCAFG00000007075.4	TPX2	27.866	2.384	0.00039
ENSCAFG00000000102.3	ENSCAFT00000000163.3	122.527	1.13	0.00039
ENSCAFG00000005520.3	SNRPB2	182.492	0.947	0.00039
ENSCAFG00000008141.4	FBXW7	41.353	-0.332	0.00039
ENSCAFG00000003432.4	CTTNBP2	0.733	-0.802	0.00039
ENSCAFG00000019702.3	PRSS57	12.398	2.644	0.0004
ENSCAFG00000012687.5	EIF4G1	17.483	1.192	0.0004
ENSCAFG00000032595.1	SNRPG	1161.75	0.909	0.0004
ENSCAFG00000029596.1	GNA12	19.618	-0.693	0.0004
ENSCAFG00000016677.3	NCAPG	14.831	2.651	0.00042
ENSCAFG00000003758.3	PCDH18	11.654	-0.83	0.00043
ENSCAFG00000006651.3	NOP56	47.592	1.031	0.00044
ENSCAFG00000032723.1	H2AFV	66.307	1.012	0.00044
ENSCAFG00000017913.3	PMP22	27.792	-0.829	0.00044
ENSCAFG00000017535.4	KIF23	9.325	2.444	0.00045
ENSCAFG00000020233.3	LMO4	69.558	-0.374	0.00045
ENSCAFG00000020057.3	PLPPR5	1.145	-1.156	0.00045
ENSCAFG00000017474.5	MPO	75.784	4.58	0.00046
ENSCAFG00000012136.3	NEK2	11.769	2.555	0.00046
ENSCAFG00000002664.4	MSH6	17.369	1.213	0.00046
ENSCAFG00000032127.1	CHST11	6.813	1.255	0.00048
ENSCAFG00000002261.3	FAM120A	103.031	0.788	0.00048
ENSCAFG00000010924.4	PKNOX2	1.492	-0.802	0.00048
ENSCAFG00000007178.4	KIF20B	25.887	1.485	0.00049
ENSCAFG00000000100.3	SEC11C	206.293	1.189	0.00049
ENSCAFG00000031096.1	TMEM109	14.269	-0.321	0.0005
ENSCAFG00000017656.3	PSTPIP2	67.447	-0.674	0.0005
ENSCAFG00000011002.3	TINAGL1	10.935	-1.226	0.0005
ENSCAFG00000002661.3	SMC2	42.463	2.074	0.00051
ENSCAFG00000001855.4	SRI	57.865	2.084	0.00053
ENSCAFG00000013807.3	TMEM47	6.713	-0.506	0.00053
ENSCAFG00000023086.2	NR5A1	4.756	-0.986	0.00053
ENSCAFG00000011580.3	ENPEP	18.588	-1.306	0.00054
ENSCAFG00000029775.1	CTSG	280.894	5.163	0.00056
ENSCAFG00000017516.3	CALM1	230.382	-0.117	0.00056
ENSCAFG00000018501.5	MPRIP	14.936	-0.517	0.00056
ENSCAFG00000013663.3	GNAZ	10.69	2.707	0.00057
ENSCAFG00000030052.1	ENSCAFT00000016130.3	11.063	2.978	0.00058
ENSCAFG00000030335.2	SERPINB9	14.469	-0.459	0.00058
ENSCAFG00000028765.1	ENSCAFT00000049194.1	118.09	-0.533	0.00058
ENSCAFG00000001324.3	ATF4	298.141	0.964	0.00059
ENSCAFG00000005619.5	ARHGEF17	2.585	-0.582	0.0006
ENSCAFG00000013544.4	HSPB1	346.749	-0.701	0.00061
ENSCAFG00000010836.4	CENPE	13.72	2.261	0.00062
ENSCAFG00000004754.3	MCM10	8.079	2.083	0.00062
ENSCAFG00000010330.3	TMEM183A	18.381	1.479	0.00062
ENSCAFG00000003083.3	CCT4	34.737	1.309	0.00062
ENSCAFG00000015878.3	UCHL1	27.642	2.458	0.00063
ENSCAFG00000007778.3	BIN2	31.918	1.256	0.00063
ENSCAFG00000017093.3	CALR	92.351	1.234	0.00063
ENSCAFG00000017230.3	SLIRP	1362.43	1.146	0.00063
ENSCAFG00000005961.4	MRPS31	37.151	-0.423	0.00063
ENSCAFG00000004260.3	ENSCAFT00000006834.3	1216.7	-0.567	0.00063
ENSCAFG00000018423.3	ITGA2	3.711	2.046	0.00064
ENSCAFG00000001771.4	WASL	9.584	-0.513	0.00064
ENSCAFG00000032439.1	PPTC7	1.103	-0.821	0.00064
ENSCAFG00000014734.4	PKD1L1	5.847	1.931	0.00065
ENSCAFG00000015675.3	LYAR	243.683	1.077	0.00065
ENSCAFG00000013302.5	BAZ1A	37.944	0.993	0.00065
ENSCAFG00000016678.3	KPNB1	55.905	0.812	0.00065
ENSCAFG00000004323.3	RSBN1L	30.994	-0.312	0.00065
ENSCAFG00000004710.4	NIFK	114.009	0.801	0.00068
ENSCAFG00000014079.4	CCDC141	3.68	-0.791	0.00068
ENSCAFG00000003962.4	FAT4	0.38	-0.517	0.00069
ENSCAFG00000001166.3	KHDRBS3	2.773	-1.775	0.00069
ENSCAFG00000017974.3	NOL4	3.888	1.744	0.00072
ENSCAFG00000004116.3	PSMB1	66.714	1.131	0.00072
ENSCAFG00000018349.3	CCL2	63.11	2.347	0.00073
ENSCAFG00000019401.3	PGP	32.776	1.662	0.00073
ENSCAFG00000013151.3	ARHGAP5	18.134	-0.378	0.00075
ENSCAFG00000006073.4	POSTN	0.225	-0.915	0.00075
ENSCAFG00000009905.4	MMP9	26.115	4.088	0.00076
ENSCAFG00000013353.4	MGST3	357.477	2.123	0.00076
ENSCAFG00000010227.3	RPLP0	1409.15	0.871	0.00078
ENSCAFG00000016632.3	EIF4A1	48.789	1.19	0.0008
ENSCAFG00000009777.5	NAV2	1.476	-0.67	0.0008
ENSCAFG00000019669.3	ELANE	28.893	4.57	0.00081
ENSCAFG00000030486.1	ENSCAFT00000043283.1	28.451	2.67	0.00081
ENSCAFG00000009431.3	E2F8	10.358	2.656	0.00082
ENSCAFG00000004529.3	VIM	243.025	-0.471	0.00082
ENSCAFG00000013062.4	DOCK1	5.583	-0.785	0.00082
ENSCAFG00000002856.3	CYCS	44.316	1.346	0.00084
ENSCAFG00000009078.3	RUNX1T1	7.219	-0.562	0.00085
ENSCAFG00000024769.2	ENSCAFT00000038273.2	757.172	2.553	0.00086
ENSCAFG00000014827.4	EZH1	13.574	-0.458	0.00086
ENSCAFG00000008702.3	CA1	195.784	5.275	0.00087
ENSCAFG00000019708.3	CA6	12.865	3.439	0.00087
ENSCAFG00000028797.1	ENSCAFT00000043321.1	135.705	2.871	0.00087
ENSCAFG00000001701.4	RBFOX2	7.085	-0.954	0.00087
ENSCAFG00000001136.4	EPB41L2	1.958	-0.801	0.00088
ENSCAFG00000014630.3	RPL27	3421.58	0.809	0.00089
ENSCAFG00000019387.5	SKI	10.49	-0.322	0.00089
ENSCAFG00000018231.4	HMGXB3	32.044	-0.43	0.0009
ENSCAFG00000005005.4	TAMM41	84.306	3.542	0.00094
ENSCAFG00000005875.5	FAM98A	11.497	1.474	0.00094
ENSCAFG00000014796.4	GULP1	2.234	-0.469	0.00095
ENSCAFG00000015916.4	RAB27A	17.792	2.064	0.00096
ENSCAFG00000031549.1	SRP19	182.785	0.95	0.00096
ENSCAFG00000006264.3	PCLO	0.346	-0.373	0.00097
ENSCAFG00000000316.3	SLC16A7	53.644	2.073	0.00098
ENSCAFG00000012525.4	MUC13	22.877	3.189	0.00099
ENSCAFG00000028626.1	SLPI	1653.81	4.837	0.001
ENSCAFG00000016600.3	CCNB2	10.43	2.543	0.001
ENSCAFG00000014571.4	CDC45	3.19	2.272	0.001
ENSCAFG00000028715.1	HMGB3	8.932	2.069	0.001
ENSCAFG00000004052.4	MCM2	5.203	1.975	0.001
ENSCAFG00000006036.3	ENSCAFT00000009744.3	40.022	1.941	0.001
ENSCAFG00000018395.3	NDC80	9.182	1.916	0.001
ENSCAFG00000005259.3	CDC20	9.158	1.877	0.001
ENSCAFG00000001584.3	TREML1	32.359	1.876	0.001
ENSCAFG00000002464.4	ANP32B	683.561	1.723	0.001
ENSCAFG00000014220.4	C1R	69.317	1.579	0.001
ENSCAFG00000004035.5	PUS7	9.62	1.523	0.001
ENSCAFG00000013864.3	ENSCAFT00000021985.3	338.525	1.457	0.001
ENSCAFG00000011260.3	CSE1L	2.65	1.429	0.001
ENSCAFG00000013063.4	TBCD	8.691	1.368	0.001
ENSCAFG00000030531.1	LLPH	50.635	1.071	0.001
ENSCAFG00000031036.1	E2F3	11.884	1.07	0.001
ENSCAFG00000000444.3	FLOT1	146.886	1.06	0.001
ENSCAFG00000018538.3	SERBP1	143.04	0.925	0.001
ENSCAFG00000012407.4	FZD7	54.548	0.862	0.001
ENSCAFG00000012330.2	TMEM206	17.828	-0.207	0.001
ENSCAFG00000031003.2	ENSCAFT00000048276.2	255.98	-0.264	0.001
ENSCAFG00000010452.3	KDM5B	17.796	-0.316	0.001
ENSCAFG00000031546.2	PIK3C2A	5.591	-0.468	0.001
ENSCAFG00000007042.5	DNAH10	0.954	-0.623	0.001
ENSCAFG00000018673.4	SMARCA1	2.989	-0.632	0.001
ENSCAFG00000018932.3	FHL1	7.352	-0.65	0.001
ENSCAFG00000028603.2	ENSCAFT00000044048.2	9.274	-0.669	0.001
ENSCAFG00000007906.4	WWC2	3.813	-0.748	0.001
ENSCAFG00000008285.3	HNF4G	0.478	-0.843	0.001
ENSCAFG00000004870.3	PCDH17	11.92	-0.862	0.001
ENSCAFG00000010148.2	SLC45A3	2.669	-0.875	0.001
ENSCAFG00000011252.3	LEF1	3.169	-0.97	0.001
ENSCAFG00000012032.3	SEMA5B	0.87	-1.139	0.001
ENSCAFG00000000274.2	HEBP2	2.253	-1.236	0.001
ENSCAFG00000008354.3	SCARA5	2.057	-1.273	0.001
ENSCAFG00000025202.2	CA2	103.487	4.157	0.002
ENSCAFG00000011834.4	NOSTRIN	45.162	3.053	0.002
ENSCAFG00000025296.2	CLEC1B	9.96	2.596	0.002
ENSCAFG00000008268.3	MND1	35.551	2.466	0.002
ENSCAFG00000003704.2	SHCBP1	7.562	2.449	0.002
ENSCAFG00000013735.4	ITGB3	21.044	2.263	0.002
ENSCAFG00000031786.1	ENSCAFT00000045631.1	19633.2	2.201	0.002
ENSCAFG00000009408.3	CCNE2	17.154	2.153	0.002
ENSCAFG00000007497.3	KIF11	12.135	2.101	0.002
ENSCAFG00000015026.4	DLGAP5	13.87	2.079	0.002
ENSCAFG00000003957.3	SF3B6	101.161	2.019	0.002
ENSCAFG00000005806.4	SGO1	10.722	1.989	0.002
ENSCAFG00000007416.4	WEE1	3.647	1.941	0.002
ENSCAFG00000003744.3	ORC1	11.168	1.909	0.002
ENSCAFG00000006834.3	PSMF1	15.148	1.859	0.002
ENSCAFG00000016168.3	BID	10.931	1.789	0.002
ENSCAFG00000031735.1	TNFSF13B	12.288	1.734	0.002
ENSCAFG00000007853.3	SAP30	40.04	1.692	0.002
ENSCAFG00000014785.4	CEP152	8.414	1.612	0.002
ENSCAFG00000018036.3	HSP90AA1	928.858	1.339	0.002
ENSCAFG00000001763.4	KLHDC3	33.824	1.27	0.002
ENSCAFG00000019288.3	SSR4	217.593	1.261	0.002
ENSCAFG00000009211.4	ENSCAFT00000014677.4	87.639	1.259	0.002
ENSCAFG00000000293.3	ENSCAFT00000000451.3	37.929	1.205	0.002
ENSCAFG00000001076.4	H2AFY	16.771	1.137	0.002
ENSCAFG00000001090.4	PHF5A	31.231	1.098	0.002
ENSCAFG00000011816.3	DGKD	5.302	1.074	0.002
ENSCAFG00000009004.3	GNL3	42.926	1.044	0.002
ENSCAFG00000016912.3	NPM1	259.423	1.028	0.002
ENSCAFG00000002533.2	SEC61B	392.79	1.001	0.002
ENSCAFG00000004148.3	RPN1	27.968	0.976	0.002
ENSCAFG00000009223.3	RPAP3	14.659	0.944	0.002
ENSCAFG00000032262.1	DHRS1	26.799	0.862	0.002
ENSCAFG00000017691.3	ILF3	31.881	0.818	0.002
ENSCAFG00000016341.4	ZBTB4	19.214	-0.292	0.002
ENSCAFG00000010478.3	CTTN	50.822	-0.313	0.002
ENSCAFG00000005497.2	ZEB2	14.892	-0.347	0.002
ENSCAFG00000012644.4	NBEAL1	3.82	-0.363	0.002
ENSCAFG00000016154.3	TMEM63A	8.733	-0.387	0.002
ENSCAFG00000030537.1	HSPB8	26.2	-0.438	0.002
ENSCAFG00000000963.3	RGL2	8.359	-0.457	0.002
ENSCAFG00000002054.4	ADGRF5	20.28	-0.468	0.002
ENSCAFG00000028589.1	ENSCAFT00000043507.1	192.397	-0.487	0.002
ENSCAFG00000001460.3	PTPRD	0.416	-0.502	0.002
ENSCAFG00000005627.3	JAG1	8.108	-0.517	0.002
ENSCAFG00000005997.2	GPCPD1	20.292	-0.519	0.002
ENSCAFG00000003282.4	ZNF618	8.005	-0.526	0.002
ENSCAFG00000029474.1	GADD45A	50.211	-0.532	0.002
ENSCAFG00000032753.1	TEX36	11.209	-0.6	0.002
ENSCAFG00000015258.4	ATP1B1	31.049	-0.624	0.002
ENSCAFG00000002023.4	RCAN2	6.392	-0.633	0.002
ENSCAFG00000014843.4	FERMT2	27.84	-0.635	0.002
ENSCAFG00000008871.3	ANTXR2	42.531	-0.666	0.002
ENSCAFG00000003276.3	ANTXR1	15.935	-0.671	0.002
ENSCAFG00000001711.3	HMOX1	93.423	-0.731	0.002
ENSCAFG00000032273.2	FXYD6	249.835	-0.751	0.002
ENSCAFG00000004374.4	SOX9	2.381	-0.775	0.002
ENSCAFG00000001900.4	FAM189A2	4.692	-0.8	0.002
ENSCAFG00000007793.3	ENPP6	0.531	-0.812	0.002
ENSCAFG00000001462.3	TLE1	2.384	-0.873	0.002
ENSCAFG00000016602.3	SMOC1	1.222	-0.912	0.002
ENSCAFG00000009782.3	PRICKLE1	2.836	-0.914	0.002
ENSCAFG00000006426.4	MAP4K3	10.231	-0.916	0.002
ENSCAFG00000002163.4	ROR2	2.031	-0.96	0.002
ENSCAFG00000012891.4	PARD3B	17.367	-0.975	0.002
ENSCAFG00000001890.3	MAMDC2	1.958	-0.976	0.002
ENSCAFG00000006638.3	SNAI2	3.116	-1.029	0.002
ENSCAFG00000015705.4	MSX1	2.79	-1.057	0.002
ENSCAFG00000014308.3	ALAS2	47.721	-1.969	0.002
ENSCAFG00000007356.4	BPIFB4	10.074	3.71	0.003
ENSCAFG00000014112.4	KIF15	22.234	2.22	0.003
ENSCAFG00000001709.3	MCM5	16.658	2.078	0.003
ENSCAFG00000028577.1	XK	4.756	1.971	0.003
ENSCAFG00000013369.3	PRDX4	27.32	1.887	0.003
ENSCAFG00000016741.5	HDGF	174.972	1.844	0.003
ENSCAFG00000007163.3	NDUFAF2	74.616	1.792	0.003
ENSCAFG00000009881.3	ALAS1	17.73	1.788	0.003
ENSCAFG00000011757.4	RCC1	6.974	1.671	0.003
ENSCAFG00000018481.4	ATAD5	12.702	1.63	0.003
ENSCAFG00000030187.1	ENSCAFT00000048735.1	45.291	1.571	0.003
ENSCAFG00000019070.4	CHAF1A	11.223	1.532	0.003
ENSCAFG00000023628.3	NME1	241.146	1.439	0.003
ENSCAFG00000006670.3	RAN	86.782	1.4	0.003
ENSCAFG00000015215.3	F5	1.641	1.288	0.003
ENSCAFG00000019035.3	MRPL37	6.454	1.266	0.003
ENSCAFG00000016880.3	ATP5MC1	57.044	1.244	0.003
ENSCAFG00000016089.4	PARP1	43.356	1.202	0.003
ENSCAFG00000019574.4	ACOT7	11.769	1.147	0.003
ENSCAFG00000009449.3	UQCRB	1483.76	1.07	0.003
ENSCAFG00000000397.4	CAND1	10.003	1.066	0.003
ENSCAFG00000007498.3	EIF2S2	317.953	1.029	0.003
ENSCAFG00000018856.4	GSPT1	83.458	0.944	0.003
ENSCAFG00000003361.1	ENSCAFT00000005389.1	7343.56	0.937	0.003
ENSCAFG00000031955.1	RPS26	679.037	0.913	0.003
ENSCAFG00000029086.1	ARF4	27.486	0.912	0.003
ENSCAFG00000019847.3	SARS	49.275	0.892	0.003
ENSCAFG00000002860.3	PPP4R3B	38.905	0.885	0.003
ENSCAFG00000001944.3	TXNRD1	42.657	0.853	0.003
ENSCAFG00000017680.3	RPL7A	1419.33	0.844	0.003
ENSCAFG00000020243.4	ZFHX3	8.625	-0.27	0.003
ENSCAFG00000000312.5	PHACTR2	81.506	-0.295	0.003
ENSCAFG00000003662.4	TBC1D9	12.268	-0.344	0.003
ENSCAFG00000013823.4	SPECC1L	17.023	-0.356	0.003
ENSCAFG00000008700.3	FNIP2	7.797	-0.391	0.003
ENSCAFG00000019785.4	KIF1B	4.415	-0.425	0.003
ENSCAFG00000020254.4	NFAT5	4.501	-0.436	0.003
ENSCAFG00000011751.4	CD86	91.986	-0.456	0.003
ENSCAFG00000018169.3	CCL14	390.607	-0.558	0.003
ENSCAFG00000009978.3	ETS2	33.693	-0.61	0.003
ENSCAFG00000008938.5	RAB11FIP5	2.826	-0.623	0.003
ENSCAFG00000032525.1	AHNAK	4.723	-0.661	0.003
ENSCAFG00000006362.3	NPHP3	1.331	-0.695	0.003
ENSCAFG00000004544.3	DLG2	0.389	-0.707	0.003
ENSCAFG00000015427.4	ZNF503	44.48	-0.708	0.003
ENSCAFG00000005033.3	SLC6A1	0.414	-0.807	0.003
ENSCAFG00000012922.3	SMTN	1.419	-0.926	0.003
ENSCAFG00000017937.3	CYP1A1	0.924	-1.018	0.003
ENSCAFG00000009519.3	WISP2	6.397	-1.038	0.003
ENSCAFG00000008711.4	MME	3.285	-1.051	0.003
ENSCAFG00000014338.5	NRXN2	11.519	-1.076	0.003
ENSCAFG00000013039.3	ZNF365	0.669	-1.293	0.003
ENSCAFG00000012713.5	KIF1A	1.494	-1.313	0.003
ENSCAFG00000013255.3	MKI67	32.249	2.725	0.004
ENSCAFG00000029809.1	CACNG2	20.431	2.645	0.004
ENSCAFG00000016394.3	PLEK2	5.04	2.349	0.004
ENSCAFG00000007614.3	CCNE1	14.654	1.969	0.004
ENSCAFG00000016355.3	DDX39A	10.629	1.589	0.004
ENSCAFG00000029686.2	ENSCAFT00000016396.4	43.029	1.553	0.004
ENSCAFG00000019226.3	PAM16	118.219	1.534	0.004
ENSCAFG00000015311.3	TIPRL	8.028	1.482	0.004
ENSCAFG00000005945.4	RRM1	25.456	1.459	0.004
ENSCAFG00000005182.4	FANCD2	3.765	1.393	0.004
ENSCAFG00000016750.3	RRNAD1	22.15	1.385	0.004
ENSCAFG00000017708.3	ENSCAFT00000028088.3	8.757	1.377	0.004
ENSCAFG00000017892.3	ENSCAFT00000028366.3	25.281	1.351	0.004
ENSCAFG00000008157.3	TMEM70	26.702	1.339	0.004
ENSCAFG00000019620.3	ENSCAFT00000031188.3	32.653	1.26	0.004
ENSCAFG00000009799.4	NCAPD3	5.508	1.255	0.004
ENSCAFG00000032033.1	APEX1	41.347	1.243	0.004
ENSCAFG00000019272.3	NCLN	7.763	1.226	0.004
ENSCAFG00000000732.3	TCP1	50.908	1.185	0.004
ENSCAFG00000011428.3	KRAS	71.959	1.165	0.004
ENSCAFG00000006431.3	LARS	12.341	1.093	0.004
ENSCAFG00000023538.2	SRRT	26.126	1.009	0.004
ENSCAFG00000004767.4	CAD	6.116	1.005	0.004
ENSCAFG00000020261.3	ENSCAFT00000049470.1	93.648	0.999	0.004
ENSCAFG00000005827.5	PRPF40A	67.316	0.866	0.004
ENSCAFG00000000190.3	RPS12	13953.8	0.859	0.004
ENSCAFG00000029259.1	ENSCAFT00000047955.1	146.713	-0.055	0.004
ENSCAFG00000019967.3	MBTPS1	11.991	-0.28	0.004
ENSCAFG00000020081.4	BCAR1	8.213	-0.359	0.004
ENSCAFG00000010406.3	CPNE8	3.835	-0.439	0.004
ENSCAFG00000002741.3	MYO6	3.473	-0.533	0.004
ENSCAFG00000003793.3	SESN1	24.262	-0.68	0.004
ENSCAFG00000010994.4	PPFIBP1	10.694	-0.685	0.004
ENSCAFG00000000693.3	ANGPT1	13.527	-0.694	0.004
ENSCAFG00000005689.4	NPTX1	0.581	-0.748	0.004
ENSCAFG00000008092.3	NRIP1	2.429	-0.75	0.004
ENSCAFG00000030111.1	NCALD	11.167	-0.822	0.004
ENSCAFG00000010852.3	SYNM	1.421	-0.826	0.004
ENSCAFG00000005036.3	DPP6	5.146	-0.827	0.004
ENSCAFG00000007580.2	LYVE1	17.755	-0.906	0.004
ENSCAFG00000012084.4	ADCY5	2.53	-1.142	0.004
ENSCAFG00000014005.4	ANGPTL1	1.868	-1.352	0.004
ENSCAFG00000025365.2	ACKR1	3.537	1.908	0.005
ENSCAFG00000018934.4	UHRF1	7.922	1.733	0.005
ENSCAFG00000014145.3	ITGA2B	9.511	1.72	0.005
ENSCAFG00000008878.4	MIS18A	10.4	1.614	0.005
ENSCAFG00000023384.3	CCDC38	8.186	1.487	0.005
ENSCAFG00000011479.3	ENSCAFT00000018256.3	2.353	1.415	0.005
ENSCAFG00000019652.4	ARID3A	7.065	1.374	0.005
ENSCAFG00000014062.4	FANCM	2.03	1.33	0.005
ENSCAFG00000016386.3	EIF2S1	10.977	1.294	0.005
ENSCAFG00000007669.4	CLCN3	8.266	1.282	0.005
ENSCAFG00000013366.3	ENSCAFT00000021214.3	832.336	1.251	0.005
ENSCAFG00000024413.2	ENSCAFT00000037707.2	1613.15	1.234	0.005
ENSCAFG00000031832.1	CCDC115	15.327	1.187	0.005
ENSCAFG00000002264.3	FBXO9	31.26	1.165	0.005
ENSCAFG00000029620.1	SRSF7	10.913	1.137	0.005
ENSCAFG00000020224.3	PSMB7	129.487	0.979	0.005
ENSCAFG00000005764.3	RPL15	724.624	0.931	0.005
ENSCAFG00000010873.3	EPRS	18.59	0.79	0.005
ENSCAFG00000017584.4	SMARCA4	34.245	0.782	0.005
ENSCAFG00000004464.4	SDK2	10.323	-0.039	0.005
ENSCAFG00000017552.3	S100A5	86.238	-0.16	0.005
ENSCAFG00000017162.3	PBXIP1	12.751	-0.282	0.005
ENSCAFG00000000326.4	UTRN	12.555	-0.343	0.005
ENSCAFG00000015414.4	CREG1	230.225	-0.37	0.005
ENSCAFG00000016700.4	RORA	5.651	-0.428	0.005
ENSCAFG00000010071.3	PDLIM5	3.946	-0.497	0.005
ENSCAFG00000000070.3	PHLPP1	2.362	-0.552	0.005
ENSCAFG00000005535.3	SRGAP3	3.152	-0.582	0.005
ENSCAFG00000006720.4	AMOTL2	10.184	-0.586	0.005
ENSCAFG00000013740.4	MAP2	1.142	-0.638	0.005
ENSCAFG00000001565.4	DAAM2	1.051	-0.812	0.005
ENSCAFG00000031828.1	ENSCAFT00000047912.1	1.542	-0.822	0.005
ENSCAFG00000013143.4	PCSK7	1.532	-0.884	0.005
ENSCAFG00000031257.1	GPR83	1.701	-0.931	0.005
ENSCAFG00000017907.3	GM2A	2.651	-1.106	0.005
ENSCAFG00000015657.4	PCSK1N	3.017	-1.51	0.005
ENSCAFG00000000155.3	TAC3	9.343	-1.669	0.005
ENSCAFG00000030298.1	ENSCAFT00000045921.1	6.476	-2.623	0.005
ENSCAFG00000017538.3	SPC24	19.883	2.238	0.006
ENSCAFG00000011859.3	SPC25	30.421	2.209	0.006
ENSCAFG00000030087.1	ENSCAFT00000043765.1	31.314	2.205	0.006
ENSCAFG00000029436.1	TMEM167A	62.66	2.048	0.006
ENSCAFG00000028905.1	CDKN2C	23.158	2	0.006
ENSCAFG00000004617.3	APOE	47.405	1.953	0.006
ENSCAFG00000011403.4	ASPM	9.255	1.917	0.006
ENSCAFG00000008236.4	ENSCAFT00000045444.2	5.18	1.65	0.006
ENSCAFG00000030193.1	PAQR8	8.287	1.597	0.006
ENSCAFG00000007282.3	NUP37	18.325	1.524	0.006
ENSCAFG00000005213.3	IL15RA	2.53	1.522	0.006
ENSCAFG00000014303.3	ATIC	15.169	1.399	0.006
ENSCAFG00000008972.3	ENSCAFT00000014312.3	1.357	1.394	0.006
ENSCAFG00000002885.4	HNRNPA2B1	44.352	1.31	0.006
ENSCAFG00000006597.4	HMGB1	853.469	1.302	0.006
ENSCAFG00000012111.3	NDUFB3	679.135	1.221	0.006
ENSCAFG00000008780.4	GMPS	28.579	1.179	0.006
ENSCAFG00000001834.3	CUL9	6.753	1.071	0.006
ENSCAFG00000003334.4	ABCA13	1.011	1.004	0.006
ENSCAFG00000004895.4	DBI	578.533	0.995	0.006
ENSCAFG00000018247.3	SNRPD1	276.77	0.95	0.006
ENSCAFG00000001048.3	DDX46	51.874	0.803	0.006
ENSCAFG00000020423.3	SRSF11	173.502	0.766	0.006
ENSCAFG00000002278.4	EIF5B	144.211	0.731	0.006
ENSCAFG00000005779.5	PPP1R12A	78.745	-0.081	0.006
ENSCAFG00000003120.4	MACF1	16.975	-0.133	0.006
ENSCAFG00000002013.5	SMARCA2	36.961	-0.219	0.006
ENSCAFG00000007626.3	PIK3R1	30.136	-0.247	0.006
ENSCAFG00000005019.3	GATA3	11.248	-0.324	0.006
ENSCAFG00000007207.3	LATS2	7.765	-0.399	0.006
ENSCAFG00000017532.4	ENSCAFT00000027790.4	13.882	-0.507	0.006
ENSCAFG00000010911.3	NR2F2	18.214	-0.633	0.006
ENSCAFG00000031669.1	CNRIP1	5.659	-0.646	0.006
ENSCAFG00000011179.3	FAM20C	3.415	-0.653	0.006
ENSCAFG00000012789.3	PTPRO	0.829	-0.659	0.006
ENSCAFG00000016948.4	LTBP2	1.8	-0.702	0.006
ENSCAFG00000019081.3	MYO10	4.689	-0.8	0.006
ENSCAFG00000004110.5	TRPC3	0.425	-0.801	0.006
ENSCAFG00000007115.3	ENSCAFT00000011396.3	0.8	-0.848	0.006
ENSCAFG00000025567.2	A2M	0.876	-0.856	0.006
ENSCAFG00000004161.4	MEIS3	1.438	-0.934	0.006
ENSCAFG00000005133.6	LTBP4	6.902	-0.967	0.006
ENSCAFG00000002174.3	GADD45G	7.956	-1.09	0.006
ENSCAFG00000007976.4	TEAD1	2.441	-1.179	0.006
ENSCAFG00000030375.1	ENSCAFT00000046020.1	208.015	4.084	0.007
ENSCAFG00000023105.3	CRISP2	6.498	3.137	0.007
ENSCAFG00000009182.3	CPOX	54.051	2.929	0.007
ENSCAFG00000012941.3	TFRC	24.69	2.826	0.007
ENSCAFG00000012137.3	ABCB10	7.157	1.889	0.007
ENSCAFG00000002766.3	IGF2BP3	34.293	1.811	0.007
ENSCAFG00000019714.3	SLC2A5	109.367	1.625	0.007
ENSCAFG00000024949.2	KBTBD7	3.43	1.608	0.007
ENSCAFG00000006395.3	ENSCAFT00000010335.3	444.919	1.541	0.007
ENSCAFG00000014295.4	SMC4	70.403	1.461	0.007
ENSCAFG00000016992.3	SPDL1	10.115	1.341	0.007
ENSCAFG00000014748.3	MCM7	11.4	1.325	0.007
ENSCAFG00000015832.3	SDHB	62.78	1.148	0.007
ENSCAFG00000007947.6	SSRP1	53.659	1.146	0.007
ENSCAFG00000018384.3	SLC25A5	47.094	1.113	0.007
ENSCAFG00000006702.3	HSD17B12	18.798	1.101	0.007
ENSCAFG00000032280.1	TMED4	34.737	1.098	0.007
ENSCAFG00000004107.4	SEC61A1	28.227	1.06	0.007
ENSCAFG00000014863.5	RBM10	39.066	1.054	0.007
ENSCAFG00000007417.4	MAN2A1	59.9	0.943	0.007
ENSCAFG00000005907.2	ZMAT2	387.299	0.924	0.007
ENSCAFG00000000950.3	RPS18	3299.09	0.854	0.007
ENSCAFG00000001346.3	RPL3	431.626	0.814	0.007
ENSCAFG00000014817.3	ISYNA1	35.638	-0.061	0.007
ENSCAFG00000029621.1	ACER2	4.963	-0.416	0.007
ENSCAFG00000011665.4	SIPA1L2	1.54	-0.595	0.007
ENSCAFG00000005003.3	NCKAP5	2.062	-0.702	0.007
ENSCAFG00000016763.4	RGS6	3.346	-0.752	0.007
ENSCAFG00000002663.3	CD109	0.813	-0.807	0.007
ENSCAFG00000018002.4	KLHL14	1.095	-0.92	0.007
ENSCAFG00000023636.3	PRSS22	3.427	-1.024	0.007
ENSCAFG00000016934.4	NGFR	9.667	-1.074	0.007
ENSCAFG00000011594.3	RLBP1	0.683	-1.266	0.007
ENSCAFG00000000712.3	CYP21A2	1.67	-1.305	0.007
ENSCAFG00000000056.3	CDH7	0.704	-1.313	0.007
ENSCAFG00000009745.4	UBE2C	21.694	2.771	0.008
ENSCAFG00000007392.4	CENPK	30.942	2.574	0.008
ENSCAFG00000017264.4	ENSCAFT00000046571.2	63.063	2.191	0.008
ENSCAFG00000003683.3	ORC6	10.358	1.977	0.008
ENSCAFG00000023072.2	POC1A	6.166	1.865	0.008
ENSCAFG00000006931.4	AACS	4.045	1.855	0.008
ENSCAFG00000014018.3	FKBP3	33.678	1.659	0.008
ENSCAFG00000013154.4	ENSCAFT00000045910.2	167.173	1.61	0.008
ENSCAFG00000016958.4	KIF22	8.164	1.582	0.008
ENSCAFG00000004456.3	NDUFB6	164.386	1.382	0.008
ENSCAFG00000014960.4	ATP8B4	2.162	1.331	0.008
ENSCAFG00000015377.4	KIAA0586	4.604	1.303	0.008
ENSCAFG00000000094.3	LMAN1	71.352	1.222	0.008
ENSCAFG00000023690.2	ERCC6L	1.209	1.183	0.008
ENSCAFG00000019323.3	SDF4	40.323	1.118	0.008
ENSCAFG00000017591.3	UBR7	9.565	1.054	0.008
ENSCAFG00000009146.4	RBM19	10.262	1.039	0.008
ENSCAFG00000013408.3	ENSCAFT00000021277.3	5.585	-0.194	0.008
ENSCAFG00000008118.3	ARRDC3	11.257	-0.341	0.008
ENSCAFG00000009055.5	JMY	7.324	-0.359	0.008
ENSCAFG00000011136.3	INPP5A	4.975	-0.367	0.008
ENSCAFG00000000569.4	ZNF608	4.643	-0.46	0.008
ENSCAFG00000006985.5	NCOR2	6.095	-0.462	0.008
ENSCAFG00000019919.3	IRF8	21.979	-0.496	0.008
ENSCAFG00000002640.5	RIMS1	3.418	-0.746	0.008
ENSCAFG00000001852.4	ADAM22	2.029	-0.836	0.008
ENSCAFG00000019677.3	ENSCAFT00000031287.3	4.235	-1.773	0.008
ENSCAFG00000003102.3	AQP1	43.153	3.076	0.009
ENSCAFG00000019877.3	GFI1B	21.997	3.019	0.009
ENSCAFG00000012976.3	NARF	30.021	1.692	0.009
ENSCAFG00000000115.3	CS	7.587	1.525	0.009
ENSCAFG00000010509.3	UBE2T	26.526	1.283	0.009
ENSCAFG00000029055.1	ENSCAFT00000032391.1	2386.62	1.107	0.009
ENSCAFG00000002527.4	LRPPRC	10.168	1.049	0.009
ENSCAFG00000019693.4	PTBP1	39.19	0.965	0.009
ENSCAFG00000013761.4	CCAR1	63.581	0.862	0.009
ENSCAFG00000001981.4	SLC29A1	576.046	0.861	0.009
ENSCAFG00000016944.5	ASH1L	13.161	-0.093	0.009
ENSCAFG00000009922.4	RBMS1	51.967	-0.096	0.009
ENSCAFG00000023898.4	MAP7D1	25.278	-0.147	0.009
ENSCAFG00000001566.4	CNTLN	10.841	-0.341	0.009
ENSCAFG00000005121.3	SFMBT2	7.539	-0.402	0.009
ENSCAFG00000003307.3	DOCK4	1.403	-0.441	0.009
ENSCAFG00000000148.3	RDH16	4.745	-0.499	0.009
ENSCAFG00000009427.3	PTPN13	2.893	-0.506	0.009
ENSCAFG00000010304.4	ETS1	29.888	-0.545	0.009
ENSCAFG00000006379.3	N4BP2L1	64.593	-0.583	0.009
ENSCAFG00000032304.1	ENSCAFT00000046375.1	5.636	-0.815	0.009
ENSCAFG00000032415.1	ENSCAFT00000046735.1	8.111	-1.188	0.009
ENSCAFG00000019261.2	ENSCAFT00000030580.2	110.136	4.308	0.01
ENSCAFG00000020220.3	ENSCAFT00000032207.3	11.54	3.892	0.01
ENSCAFG00000005294.3	TK1	44.036	3.171	0.01
ENSCAFG00000015342.4	RAD51AP1	12.461	2.185	0.01
ENSCAFG00000015155.3	TIMP1	141.166	1.963	0.01
ENSCAFG00000018090.3	AMMECR1	6.984	1.861	0.01
ENSCAFG00000008340.4	RACGAP1	6.552	1.838	0.01
ENSCAFG00000031977.1	C1QL4	4.963	1.796	0.01
ENSCAFG00000005143.4	MCM6	19.272	1.771	0.01
ENSCAFG00000007133.3	DEPDC1B	4.942	1.753	0.01
ENSCAFG00000011065.4	SGO2	17.661	1.533	0.01
ENSCAFG00000001652.3	HACD4	16.454	1.43	0.01
ENSCAFG00000002728.3	CDCA7L	15.316	1.159	0.01
ENSCAFG00000020393.4	ACADM	66.961	1.096	0.01
ENSCAFG00000018882.4	FAM122B	12.209	1.073	0.01
ENSCAFG00000019138.3	MAP2K2	10.987	1.011	0.01
ENSCAFG00000018858.3	TARS	23.508	0.964	0.01
ENSCAFG00000014105.3	SMARCB1	8.547	0.918	0.01
ENSCAFG00000032728.1	ENSCAFT00000042854.1	295.84	0.84	0.01
ENSCAFG00000005138.3	RPL14	1623.27	0.782	0.01
ENSCAFG00000004022.4	KIAA1109	4.252	-0.127	0.01
ENSCAFG00000001588.3	ENSCAFT00000002494.3	15.563	-0.432	0.01
ENSCAFG00000013851.4	FYCO1	6.324	-0.451	0.01
ENSCAFG00000001298.4	SCUBE3	0.64	-0.487	0.01
ENSCAFG00000029607.1	STXBP6	3.235	-0.542	0.01
ENSCAFG00000028470.1	ENSCAFT00000047931.1	29.266	-0.579	0.01
ENSCAFG00000003406.3	MET	2.84	-0.611	0.01
ENSCAFG00000002939.5	SLC4A4	3.87	-0.69	0.01
ENSCAFG00000010530.3	CCDC80	12.139	-0.811	0.01
ENSCAFG00000015560.4	KCNMB2	0.598	-0.995	0.01
ENSCAFG00000001837.3	DNPH1	24.189	2.946	0.011
ENSCAFG00000003407.3	ADD2	11.22	2.267	0.011
ENSCAFG00000007062.4	BUB1	5.946	1.918	0.011
ENSCAFG00000003180.3	SLC1A4	5.774	1.675	0.011
ENSCAFG00000002196.3	MCM3	17.046	1.573	0.011
ENSCAFG00000024922.2	ATP5PF	216.382	1.559	0.011
ENSCAFG00000006952.3	DHX37	96.414	1.404	0.011
ENSCAFG00000003000.3	PTGR1	48.702	1.383	0.011
ENSCAFG00000013489.3	UCK2	30	1.238	0.011
ENSCAFG00000007374.3	ENSCAFT00000011805.3	18.421	1.193	0.011
ENSCAFG00000007427.2	HSP90B1	479.074	1.173	0.011
ENSCAFG00000029151.1	CALM3	58.13	1.163	0.011
ENSCAFG00000012126.3	HYOU1	38.022	1.105	0.011
ENSCAFG00000013030.3	PDHA1	14.745	1.094	0.011
ENSCAFG00000013280.3	GLRX3	34.905	1.032	0.011
ENSCAFG00000010856.5	PSMD1	34.356	0.987	0.011
ENSCAFG00000028733.1	ENSCAFT00000045030.1	89.789	0.982	0.011
ENSCAFG00000012792.5	PES1	10.913	0.937	0.011
ENSCAFG00000011432.3	MAPKAPK2	36.951	0.895	0.011
ENSCAFG00000007442.3	TDG	11.578	0.891	0.011
ENSCAFG00000019411.4	OAZ1	234.042	0.037	0.011
ENSCAFG00000016586.3	SLTM	47.609	0.014	0.011
ENSCAFG00000019246.4	NFIC	101.026	-0.025	0.011
ENSCAFG00000019251.5	CREBBP	11.506	-0.042	0.011
ENSCAFG00000013467.3	POR	16.094	-0.159	0.011
ENSCAFG00000001047.3	NCOA7	14.94	-0.165	0.011
ENSCAFG00000010488.3	RPUSD4	8.133	-0.214	0.011
ENSCAFG00000016878.4	CALCOCO2	112.457	-0.264	0.011
ENSCAFG00000010456.3	S100PBP	3.741	-0.383	0.011
ENSCAFG00000019670.3	ENSCAFT00000031276.2	5.954	-0.397	0.011
ENSCAFG00000012610.4	LMO3	2.349	-0.451	0.011
ENSCAFG00000008525.4	CACNA1D	75.186	-0.571	0.011
ENSCAFG00000002709.3	FILIP1	0.813	-0.6	0.011
ENSCAFG00000003100.3	MINDY4	3.464	-0.634	0.011
ENSCAFG00000010871.3	LRP5	2.964	-0.674	0.011
ENSCAFG00000018209.3	EPN2	4.732	-0.687	0.011
ENSCAFG00000003953.4	ENSCAFT00000006351.4	2.736	-1.073	0.011
ENSCAFG00000031208.1	ENSCAFT00000048103.1	0.376	-1.092	0.011
ENSCAFG00000032289.1	BMP6	13.948	-1.933	0.011
ENSCAFG00000001586.3	TREM2	8.675	2.729	0.012
ENSCAFG00000006585.3	ALOX5AP	5.947	2.308	0.012
ENSCAFG00000000782.4	GTSE1	12.434	2.173	0.012
ENSCAFG00000018402.3	UBE2A	21.048	1.997	0.012
ENSCAFG00000004826.4	SLC6A9	4.534	1.957	0.012
ENSCAFG00000002015.4	LIMS1	30.246	1.542	0.012
ENSCAFG00000019460.3	TUBB4B	7.282	1.246	0.012
ENSCAFG00000032583.1	METTL7A	15.722	1.211	0.012
ENSCAFG00000002179.3	ENSCAFT00000003428.3	49.369	1.161	0.012
ENSCAFG00000019378.3	THOP1	12.236	1.153	0.012
ENSCAFG00000008287.3	ENSCAFT00000013187.3	43.928	1.136	0.012
ENSCAFG00000017035.3	FAM96A	24.806	1.129	0.012
ENSCAFG00000001456.3	GCAT	1.185	1.08	0.012
ENSCAFG00000015452.3	ENSCAFT00000024509.3	119.657	1.067	0.012
ENSCAFG00000001937.3	DCTN3	41.658	0.988	0.012
ENSCAFG00000032392.1	ENSCAFT00000043166.1	276.325	0.919	0.012
ENSCAFG00000017344.4	CLINT1	37.342	0.916	0.012
ENSCAFG00000031013.1	SAMSN1	18.05	-0.128	0.012
ENSCAFG00000030141.1	LONRF1	10.405	-0.208	0.012
ENSCAFG00000010142.3	SLC39A10	8.068	-0.209	0.012
ENSCAFG00000011495.3	GPX1	926.006	-0.359	0.012
ENSCAFG00000003737.3	PARD3	5.506	-0.37	0.012
ENSCAFG00000013925.3	SEMA6D	2.398	-0.409	0.012
ENSCAFG00000023562.3	DMD	2.981	-0.414	0.012
ENSCAFG00000004924.3	ENSCAFT00000007919.3	53.123	-0.431	0.012
ENSCAFG00000012991.4	ARID5B	30.866	-0.443	0.012
ENSCAFG00000023592.3	SLC8A1	6.054	-0.515	0.012
ENSCAFG00000030889.2	ZBTB47	1.752	-0.544	0.012
ENSCAFG00000014633.3	FRMD6	2.092	-0.592	0.012
ENSCAFG00000000366.3	SASH1	17.919	-0.639	0.012
ENSCAFG00000005337.3	CSGALNACT1	2.964	-0.666	0.012
ENSCAFG00000002301.4	ECM2	1.765	-0.682	0.012
ENSCAFG00000006971.3	EPHB1	1.593	-0.793	0.012
ENSCAFG00000011392.3	SSPN	27.988	-0.86	0.012
ENSCAFG00000017292.2	ENSCAFT00000027391.2	5.004	2.808	0.013
ENSCAFG00000031806.1	ENSCAFT00000022447.3	8911.81	2.656	0.013
ENSCAFG00000010889.4	CEP72	10.335	1.809	0.013
ENSCAFG00000014890.4	TUBG1	25.67	1.398	0.013
ENSCAFG00000012067.3	AP1B1	17.489	1.324	0.013
ENSCAFG00000020109.4	RFWD3	3.225	1.217	0.013
ENSCAFG00000006447.3	TOPBP1	8.284	1.186	0.013
ENSCAFG00000017802.3	VRK1	14.231	1.158	0.013
ENSCAFG00000032036.1	ENSCAFT00000044749.1	87.382	1.119	0.013
ENSCAFG00000028641.1	ENSCAFT00000049453.1	57.726	1.1	0.013
ENSCAFG00000000621.4	CLIC1	71.508	1.073	0.013
ENSCAFG00000005398.3	PSMC4	32.559	1.055	0.013
ENSCAFG00000001667.4	RBM28	10.271	1.051	0.013
ENSCAFG00000018747.3	AIFM1	11.712	0.994	0.013
ENSCAFG00000015855.3	PSMB6	66.303	0.99	0.013
ENSCAFG00000011295.3	PSMB5	28.85	0.983	0.013
ENSCAFG00000004481.3	SLC6A6	8.111	-0.181	0.013
ENSCAFG00000003549.3	ROCK2	42.764	-0.22	0.013
ENSCAFG00000014597.3	ITGAV	16.03	-0.359	0.013
ENSCAFG00000002744.4	SPTBN1	29.253	-0.394	0.013
ENSCAFG00000016413.3	GNAI1	3.396	-0.531	0.013
ENSCAFG00000005731.4	NRG2	0.807	-0.929	0.013
ENSCAFG00000015061.3	C18H11orf95	0.569	-1.139	0.013
ENSCAFG00000019120.3	C6H16orf89	0.439	-1.741	0.013
ENSCAFG00000032358.1	ENSCAFT00000048204.1	1952.72	3.131	0.014
ENSCAFG00000008378.4	ESCO2	6.73	2.026	0.014
ENSCAFG00000016106.3	CDC6	8.523	1.99	0.014
ENSCAFG00000001521.3	EXOSC4	50.508	1.33	0.014
ENSCAFG00000002541.3	ENSCAFT00000004010.3	41.658	1.23	0.014
ENSCAFG00000000982.3	NDUFA6	233.268	1.129	0.014
ENSCAFG00000009819.4	CTSA	92.619	1.104	0.014
ENSCAFG00000032626.1	SRM	17.447	1	0.014
ENSCAFG00000017502.4	ANP32A	31.547	0.974	0.014
ENSCAFG00000024483.2	ENSCAFT00000037790.2	194.894	0.769	0.014
ENSCAFG00000006936.4	RPL27A	2051.3	0.759	0.014
ENSCAFG00000009236.5	CHD6	4.087	-0.153	0.014
ENSCAFG00000009370.3	TANC1	2.117	-0.539	0.014
ENSCAFG00000004293.3	CCDC146	3.962	-0.605	0.014
ENSCAFG00000014905.3	VAMP4	32.815	-0.812	0.014
ENSCAFG00000014616.3	COMP	0.874	-0.906	0.014
ENSCAFG00000001835.3	ABCB1	1.845	-0.92	0.014
ENSCAFG00000004753.4	ARPP21	0.434	-1.004	0.014
ENSCAFG00000011574.3	HIST2H2AC	403.784	1.794	0.015
ENSCAFG00000005548.3	RAD18	9.59	1.72	0.015
ENSCAFG00000008877.3	BUB1B	6.954	1.646	0.015
ENSCAFG00000006941.3	CAT	38.862	1.292	0.015
ENSCAFG00000003101.4	UBE2J1	25.448	1.21	0.015
ENSCAFG00000008033.3	NOC3L	13.584	1.089	0.015
ENSCAFG00000006594.3	ENSCAFT00000010673.3	124.621	0.855	0.015
ENSCAFG00000001551.3	PSIP1	189.623	0.805	0.015
ENSCAFG00000007603.3	FLNB	5.42	-0.334	0.015
ENSCAFG00000031918.1	TMEM26	7.891	-0.354	0.015
ENSCAFG00000023063.2	APOL5	7.819	-0.509	0.015
ENSCAFG00000002692.4	GTF2A1L	3.326	-0.524	0.015
ENSCAFG00000003105.3	ANKRD6	1.172	-0.58	0.015
ENSCAFG00000010394.3	PHLDB2	23.443	-0.767	0.015
ENSCAFG00000006825.3	PRR5L	2.283	-0.874	0.015
ENSCAFG00000002847.4	EPB41L4B	1.88	1.703	0.016
ENSCAFG00000012800.4	SCML2	4.332	1.691	0.016
ENSCAFG00000005109.3	CXCR4	18.015	1.554	0.016
ENSCAFG00000015752.4	RCC2	15.952	1.41	0.016
ENSCAFG00000003875.4	PLK4	1.553	1.397	0.016
ENSCAFG00000002091.3	RCL1	34.8	1.143	0.016
ENSCAFG00000013869.4	NMT1	68.33	0.898	0.016
ENSCAFG00000006019.3	FREM2	0.063	-0.273	0.016
ENSCAFG00000020288.3	SNTB2	22.187	-0.397	0.016
ENSCAFG00000012173.3	UGT8	0.169	-0.552	0.016
ENSCAFG00000028746.1	JAKMIP3	0.231	-0.782	0.016
ENSCAFG00000019956.3	WFDC1	4.069	-1.303	0.016
ENSCAFG00000025443.2	ENSCAFT00000039539.2	12.804	-1.575	0.016
ENSCAFG00000003246.2	ALAD	28.173	2.766	0.017
ENSCAFG00000008090.3	HELLS	10.482	1.387	0.017
ENSCAFG00000005877.3	ALYREF	165.905	1.223	0.017
ENSCAFG00000005859.3	P4HB	47.541	1.138	0.017
ENSCAFG00000007934.3	CTSB	72.735	1.128	0.017
ENSCAFG00000018632.3	ENSCAFT00000029574.3	966.755	0.849	0.017
ENSCAFG00000009699.4	CHD9	9.769	-0.037	0.017
ENSCAFG00000018681.5	GTF2F1	43.672	-0.081	0.017
ENSCAFG00000030823.1	POMGNT2	4.006	-0.226	0.017
ENSCAFG00000016444.3	FGD1	3.402	-0.241	0.017
ENSCAFG00000031652.1	SDC2	19.538	-0.328	0.017
ENSCAFG00000015946.4	CCSER2	10.945	-0.349	0.017
ENSCAFG00000000828.3	RPS6KA2	4.315	-0.357	0.017
ENSCAFG00000017166.4	TMEM63C	2.524	-0.387	0.017
ENSCAFG00000009592.3	NELL2	0.132	-0.54	0.017
ENSCAFG00000030939.1	ENSCAFT00000050203.1	0.311	-0.589	0.017
ENSCAFG00000013770.4	ENSCAFT00000021851.4	5.957	-0.6	0.017
ENSCAFG00000010407.4	TJP1	3.598	-0.64	0.017
ENSCAFG00000010329.4	OSBPL5	0.958	-0.669	0.017
ENSCAFG00000004944.3	PCDH9	0.293	-0.938	0.017
ENSCAFG00000003941.3	SPATA6	5.051	-0.977	0.017
ENSCAFG00000000463.3	ERICH5	3.301	-1.281	0.017
ENSCAFG00000029461.1	PGLYRP1	6.937	1.549	0.018
ENSCAFG00000030400.1	TNFSF9	3.835	1.454	0.018
ENSCAFG00000019002.2	TTC4	7.474	1.413	0.018
ENSCAFG00000019406.4	SPPL2B	7.336	1.341	0.018
ENSCAFG00000010024.3	DOK2	10.923	1.235	0.018
ENSCAFG00000012608.3	PSMD2	33.38	1.233	0.018
ENSCAFG00000018498.3	SUZ12	15.929	1.187	0.018
ENSCAFG00000017053.4	PPIB	75.595	1.144	0.018
ENSCAFG00000018516.3	MRPS30	10.793	1.114	0.018
ENSCAFG00000015545.3	SUV39H1	2.027	1.076	0.018
ENSCAFG00000017648.3	ATP5F1A	96.092	0.923	0.018
ENSCAFG00000003215.4	SLC31A1	7.676	0.908	0.018
ENSCAFG00000014189.4	ACSBG1	6.741	0.89	0.018
ENSCAFG00000000083.4	PIGN	101.894	0.756	0.018
ENSCAFG00000030558.1	RTL5	36.553	-0.322	0.018
ENSCAFG00000011046.3	BCL9	2.128	-0.432	0.018
ENSCAFG00000003717.3	FAM49A	10.008	-0.487	0.018
ENSCAFG00000008077.4	STAU2	9.788	-0.498	0.018
ENSCAFG00000009720.3	CYFIP1	1.883	-0.546	0.018
ENSCAFG00000007402.3	FAM149A	4.336	-0.889	0.018
ENSCAFG00000024930.2	TMEM273	2.376	-1.042	0.018
ENSCAFG00000002931.3	DCK	4.518	1.646	0.019
ENSCAFG00000031583.1	ENSCAFT00000043698.1	10.567	1.241	0.019
ENSCAFG00000019738.3	ATP5PB	47.062	1.205	0.019
ENSCAFG00000005312.4	PGS1	7.869	1.107	0.019
ENSCAFG00000000972.3	TAPBP	28.672	1.076	0.019
ENSCAFG00000001818.3	DNAJA1	58.991	0.926	0.019
ENSCAFG00000001445.4	GRINA	31.402	0.917	0.019
ENSCAFG00000005536.3	GTPBP4	35.206	0.899	0.019
ENSCAFG00000014613.4	CUL5	21.127	0.874	0.019
ENSCAFG00000014831.3	SH3BP2	6.824	-0.138	0.019
ENSCAFG00000000652.4	TULP4	9.241	-0.157	0.019
ENSCAFG00000031602.1	XAF1	26.3	-0.314	0.019
ENSCAFG00000020198.3	LRRC8C	3.143	-0.368	0.019
ENSCAFG00000029414.1	CARD8	6.297	-0.395	0.019
ENSCAFG00000001740.3	LARGE1	1.918	-0.515	0.019
ENSCAFG00000009462.3	PRELP	4.286	-0.831	0.019
ENSCAFG00000017667.3	ENSCAFT00000028017.3	47.545	1.88	0.02
ENSCAFG00000030927.1	NFE2	22.157	1.326	0.02
ENSCAFG00000014594.4	ABHD12B	14.932	1.32	0.02
ENSCAFG00000013499.3	RNF2	2.812	1.135	0.02
ENSCAFG00000030478.2	ABCF1	37.024	0.914	0.02
ENSCAFG00000006436.3	CDV3	151.732	0.722	0.02
ENSCAFG00000014074.3	CRYAB	24.798	-0.243	0.02
ENSCAFG00000009033.4	DYSF	1.492	-0.44	0.02
ENSCAFG00000025327.3	SOX17	7.449	-0.822	0.02
ENSCAFG00000011303.3	GGPS1	7.635	-0.856	0.02
ENSCAFG00000018172.4	HEATR9	3.037	-0.985	0.02
ENSCAFG00000019983.4	PRRX2	2.512	-1.002	0.02
ENSCAFG00000028850.1	ENSCAFT00000037674.2	20.183	3.056	0.021
ENSCAFG00000028980.1	ENSCAFT00000004529.3	7.583	2.239	0.021
ENSCAFG00000004902.4	DIAPH3	10.256	1.732	0.021
ENSCAFG00000005037.3	KLF5	3.536	1.677	0.021
ENSCAFG00000028837.1	UQCR10	296.071	1.425	0.021
ENSCAFG00000012052.3	IDH2	17.134	1.343	0.021
ENSCAFG00000006506.3	ENSCAFT00000010508.3	24.276	1.199	0.021
ENSCAFG00000004160.2	TNIP3	2.585	1.154	0.021
ENSCAFG00000000683.2	ENSCAFT00000001065.2	28.616	1.145	0.021
ENSCAFG00000016418.3	EIF3B	28.386	1.05	0.021
ENSCAFG00000011109.3	NDUFV1	11.957	0.894	0.021
ENSCAFG00000018524.3	HNRNPM	156.492	0.843	0.021
ENSCAFG00000032663.1	SPCS2	59.784	0.84	0.021
ENSCAFG00000007135.4	ENSCAFT00000011437.4	184.169	-0.028	0.021
ENSCAFG00000014161.4	CDC42BPG	8.735	-0.126	0.021
ENSCAFG00000019798.4	CSF1	16.045	-0.268	0.021
ENSCAFG00000011275.4	MARK1	5.434	-0.569	0.021
ENSCAFG00000013965.2	SLC24A5	4.515	-0.691	0.021
ENSCAFG00000012338.3	NENF	61.425	-0.844	0.021
ENSCAFG00000010366.3	ALDH5A1	11.867	1.462	0.022
ENSCAFG00000001204.4	KIF20A	1.875	1.378	0.022
ENSCAFG00000008859.3	SOD1	184.492	1.358	0.022
ENSCAFG00000023168.2	HMGN2	757.858	1.32	0.022
ENSCAFG00000009963.4	PSMD14	15.484	1.159	0.022
ENSCAFG00000019084.4	NDC1	3.812	1.097	0.022
ENSCAFG00000032597.1	MRPL50	15.72	1.072	0.022
ENSCAFG00000003930.3	NDUFB2	1036.69	1.056	0.022
ENSCAFG00000010762.3	SMC3	56.59	0.978	0.022
ENSCAFG00000005075.4	R3HDM1	6.251	0.919	0.022
ENSCAFG00000001399.4	HNRNPK	146.759	0.689	0.022
ENSCAFG00000011948.3	DTX3L	26.66	-0.099	0.022
ENSCAFG00000016397.4	VPS13D	2.736	-0.283	0.022
ENSCAFG00000000868.4	SMOC2	24.712	-0.52	0.022
ENSCAFG00000002489.3	PLEKHH2	1.372	-0.523	0.022
ENSCAFG00000013288.3	ADAMTSL3	2.409	-0.613	0.022
ENSCAFG00000002573.4	SSC5D	0.603	-0.796	0.022
ENSCAFG00000012152.3	GABBR1	1.138	-0.823	0.022
ENSCAFG00000008586.3	ADAMTS1	12.027	-0.86	0.022
ENSCAFG00000012342.2	HMBS	5.475	2.109	0.023
ENSCAFG00000007303.3	GPI	5.453	1.645	0.023
ENSCAFG00000019866.3	CDT1	1.579	1.533	0.023
ENSCAFG00000002324.3	NOL8	14.642	1.007	0.023
ENSCAFG00000010621.4	RRP1B	19.847	0.859	0.023
ENSCAFG00000018704.3	SLC1A3	0.669	0.85	0.023
ENSCAFG00000008891.3	SERINC5	2.289	-0.325	0.023
ENSCAFG00000004385.4	OTOF	0.106	-0.374	0.023
ENSCAFG00000013482.4	CADM1	7.118	-0.553	0.023
ENSCAFG00000011193.4	PDGFA	9.278	-0.625	0.023
ENSCAFG00000008383.3	PFN2	4.747	-0.799	0.023
ENSCAFG00000016338.3	KAZN	1.537	-0.836	0.023
ENSCAFG00000007018.2	DEPP1	7.54	-1.737	0.023
ENSCAFG00000016716.2	CPLX2	9.449	-1.982	0.023
ENSCAFG00000010890.3	COQ10B	1300.81	1.626	0.024
ENSCAFG00000014277.3	DUT	72.845	1.455	0.024
ENSCAFG00000000412.4	MDM1	6.83	1.386	0.024
ENSCAFG00000016214.3	MRPL44	15.239	1.312	0.024
ENSCAFG00000003137.4	UGP2	22.08	1.103	0.024
ENSCAFG00000012743.3	OAT	18.433	1.083	0.024
ENSCAFG00000013954.4	KIF18B	0.926	1.078	0.024
ENSCAFG00000004104.3	CEP57	26.464	0.963	0.024
ENSCAFG00000005423.4	STT3B	17.119	0.89	0.024
ENSCAFG00000002424.3	BZW2	26.454	0.874	0.024
ENSCAFG00000024818.2	RACK1	529.129	0.759	0.024
ENSCAFG00000031865.1	ENSCAFT00000044715.1	27.406	-0.039	0.024
ENSCAFG00000018372.3	PGRMC1	23.63	-0.398	0.024
ENSCAFG00000001326.4	TEAD3	4.638	-0.416	0.024
ENSCAFG00000014332.4	EXPH5	0.592	-0.463	0.024
ENSCAFG00000008028.3	SLC9A9	7.356	-0.472	0.024
ENSCAFG00000017163.3	PRDX2	119.596	2.578	0.025
ENSCAFG00000023759.2	MT2A	190.742	2.324	0.025
ENSCAFG00000019008.4	MYDGF	23.584	1.272	0.025
ENSCAFG00000000008.3	TXNL4A	16.661	1.271	0.025
ENSCAFG00000009027.5	FAM83D	1.474	1.246	0.025
ENSCAFG00000009267.3	AP4B1	6.301	1.246	0.025
ENSCAFG00000004024.4	RINT1	10.74	1.224	0.025
ENSCAFG00000010253.4	CIP2A	18.658	1.204	0.025
ENSCAFG00000018546.3	NNT	8.11	1.023	0.025
ENSCAFG00000023172.2	RBM8A	580.329	0.865	0.025
ENSCAFG00000011715.4	LARP7	148.376	0.819	0.025
ENSCAFG00000001601.3	PLIN2	39.311	0.777	0.025
ENSCAFG00000004096.3	TTC26	4.022	-0.231	0.025
ENSCAFG00000012574.3	ZNF148	27.151	-0.286	0.025
ENSCAFG00000019189.3	BGN	75.787	-0.299	0.025
ENSCAFG00000012104.4	WASF2	7.332	-0.311	0.025
ENSCAFG00000011625.4	NFATC2	6.076	-0.378	0.025
ENSCAFG00000004787.3	CASKIN2	3.769	-0.425	0.025
ENSCAFG00000007426.3	WT1	3.564	-0.616	0.025
ENSCAFG00000016531.3	ADGRA3	0.901	-0.666	0.025
ENSCAFG00000015593.3	ENSCAFT00000039215.2	6.332	-1.114	0.025
ENSCAFG00000004342.2	GP9	16.624	2.45	0.026
ENSCAFG00000014262.3	ENSCAFT00000022665.3	5.248	2.349	0.026
ENSCAFG00000010923.3	HIST1H1C	33.167	1.967	0.026
ENSCAFG00000016443.3	PRELID1	35.469	1.34	0.026
ENSCAFG00000015309.3	SDF2L1	106.264	1.172	0.026
ENSCAFG00000006353.4	METAP2	294.645	1.108	0.026
ENSCAFG00000003918.3	RPF2	43.393	0.818	0.026
ENSCAFG00000013457.3	FASTKD2	0.892	0.755	0.026
ENSCAFG00000016616.3	IQGAP3	0.438	0.61	0.026
ENSCAFG00000009247.4	WDFY3	3.223	-0.216	0.026
ENSCAFG00000010080.4	MYO1B	28.928	-0.417	0.026
ENSCAFG00000030814.1	DOC2B	2.675	-0.633	0.026
ENSCAFG00000017312.3	ZWILCH	6.934	1.864	0.027
ENSCAFG00000011057.4	TRAIP	2.399	1.537	0.027
ENSCAFG00000017530.3	ILF2	28.278	1.336	0.027
ENSCAFG00000004818.3	SLC5A6	3.12	1.315	0.027
ENSCAFG00000018411.3	NKRF	3.147	1.048	0.027
ENSCAFG00000032070.1	SAP18	265.333	0.968	0.027
ENSCAFG00000032714.1	DNAJC19	857.686	0.868	0.027
ENSCAFG00000007638.3	CTR9	30.811	0.844	0.027
ENSCAFG00000012700.3	BUB3	17.122	0.826	0.027
ENSCAFG00000004076.3	KIF5B	27.637	0.072	0.027
ENSCAFG00000028821.1	MINPP1	9.32	-0.381	0.027
ENSCAFG00000009117.5	ENSCAFT00000012306.5	1.901	-0.543	0.027
ENSCAFG00000000925.3	DCBLD1	5.001	-0.551	0.027
ENSCAFG00000016405.4	TMEM132A	2.095	-0.583	0.027
ENSCAFG00000003465.3	EGFR	1.114	-0.791	0.027
ENSCAFG00000011107.3	STK32C	0.337	-0.875	0.027
ENSCAFG00000020395.3	RRAD	3.286	-1.041	0.027
ENSCAFG00000031132.1	TIMM8B	273.482	2.102	0.028
ENSCAFG00000017159.3	RNASEH2A	4.683	1.822	0.028
ENSCAFG00000016241.3	SMC1A	39.176	1.079	0.028
ENSCAFG00000003543.3	PSMB2	95.765	1.005	0.028
ENSCAFG00000008218.3	ADGRV1	0.034	-0.122	0.028
ENSCAFG00000001952.4	SEPT10	18.077	-0.452	0.028
ENSCAFG00000012477.4	ITGB5	19.874	-0.464	0.028
ENSCAFG00000006979.4	MTUS1	1.709	-0.536	0.028
ENSCAFG00000009800.3	ENSCAFT00000015560.3	1.677	-0.657	0.028
ENSCAFG00000004878.5	WDR86	29.503	-0.905	0.028
ENSCAFG00000003136.4	CCM2	12.133	1.225	0.029
ENSCAFG00000000348.4	CANX	109.308	0.893	0.029
ENSCAFG00000004782.4	ENSCAFT00000007677.3	11.767	0.064	0.029
ENSCAFG00000002940.4	FANCL	22.854	-0.048	0.029
ENSCAFG00000000387.4	LATS1	3.37	-0.168	0.029
ENSCAFG00000001380.3	NTRK2	2.478	-0.509	0.029
ENSCAFG00000017527.3	SRPX2	0.741	-0.637	0.029
ENSCAFG00000010049.4	GFRA2	6.216	-0.681	0.029
ENSCAFG00000009491.3	NRN1	9.135	-0.919	0.029
ENSCAFG00000010361.3	MCEE	18.518	1.4	0.03
ENSCAFG00000025364.3	INTS6	6.006	1.143	0.03
ENSCAFG00000013577.4	EIF3J	218.538	0.853	0.03
ENSCAFG00000017039.5	TAOK2	5.832	-0.328	0.03
ENSCAFG00000009872.3	CNTN1	0.132	-0.483	0.03
ENSCAFG00000002845.3	ENSCAFT00000004553.3	1273.3	2.787	0.031
ENSCAFG00000009713.2	TSHB	9.267	2.681	0.031
ENSCAFG00000014650.3	CDCA3	9.416	2.63	0.031
ENSCAFG00000015966.4	WAPL	41.366	0.919	0.031
ENSCAFG00000013458.4	ATP13A3	7.614	0.914	0.031
ENSCAFG00000000260.3	IFNGR1	15.761	-0.12	0.031
ENSCAFG00000016034.4	TNRC18	3.518	-0.253	0.031
ENSCAFG00000015021.4	USP11	10.501	-0.356	0.031
ENSCAFG00000009561.3	DNMBP	0.867	-0.47	0.031
ENSCAFG00000016635.3	MYO1E	3.08	-0.484	0.031
ENSCAFG00000013783.2	CCR5	16.195	1.928	0.032
ENSCAFG00000029331.1	AURKA	19.98	1.821	0.032
ENSCAFG00000016831.3	ENSCAFT00000026656.3	4.982	1.527	0.032
ENSCAFG00000012063.3	BMX	2.383	1.382	0.032
ENSCAFG00000002659.3	MSH2	8.217	1.311	0.032
ENSCAFG00000002933.3	POLD2	15.218	1.249	0.032
ENSCAFG00000001013.4	SREBF2	8.506	1.011	0.032
ENSCAFG00000005166.2	ENSCAFT00000008322.2	446.902	0.961	0.032
ENSCAFG00000014553.3	TPI1	58.078	0.905	0.032
ENSCAFG00000002035.3	PUM3	46.662	0.781	0.032
ENSCAFG00000020190.4	ZNF644	14.799	-0.351	0.032
ENSCAFG00000007659.4	SMAD1	4.162	-0.471	0.032
ENSCAFG00000018333.4	INF2	2.553	-0.662	0.032
ENSCAFG00000001715.3	MOB3B	4.678	-0.967	0.032
ENSCAFG00000000230.3	MYB	6.128	1.785	0.033
ENSCAFG00000004384.4	CTSC	47.19	1.377	0.033
ENSCAFG00000016120.3	SPTB	1.418	1.21	0.033
ENSCAFG00000008339.4	ALDH18A1	5.552	1.159	0.033
ENSCAFG00000031999.1	SLC30A1	12.679	1.07	0.033
ENSCAFG00000008687.4	CCT8	46.208	0.964	0.033
ENSCAFG00000013266.3	SENP2	7.244	0.882	0.033
ENSCAFG00000000064.3	CD63	808.004	0.835	0.033
ENSCAFG00000028804.2	RNF150	4.554	-0.273	0.033
ENSCAFG00000006162.4	SMAD9	1.142	-0.388	0.033
ENSCAFG00000009343.3	SLC40A1	126.414	-0.463	0.033
ENSCAFG00000003991.3	ARHGAP42	5.497	-0.525	0.033
ENSCAFG00000018180.3	ANKRD29	4.387	-0.599	0.033
ENSCAFG00000004407.3	ME3	4.537	-0.699	0.033
ENSCAFG00000006879.4	MARCH8	6.113	-0.807	0.033
ENSCAFG00000030848.1	NMB	7.295	3.286	0.034
ENSCAFG00000002141.4	RHAG	13.72	2.479	0.034
ENSCAFG00000032057.1	ENSCAFT00000036942.2	25649.5	2.297	0.034
ENSCAFG00000000426.3	LYZ	790.8	2.144	0.034
ENSCAFG00000014716.3	PSME3	7.844	2.007	0.034
ENSCAFG00000030972.2	GYPC	141.678	1.963	0.034
ENSCAFG00000003658.4	KEL	4.45	1.895	0.034
ENSCAFG00000009293.3	IQGAP2	17.291	1.122	0.034
ENSCAFG00000031210.1	OAF	7.835	1.048	0.034
ENSCAFG00000020201.3	RABEPK	66.697	1.015	0.034
ENSCAFG00000020101.3	ST6GALNAC4	26.355	0.998	0.034
ENSCAFG00000011846.3	QARS	12.641	0.979	0.034
ENSCAFG00000016797.3	PGD	51.144	0.96	0.034
ENSCAFG00000003480.4	STK17A	57.697	0.952	0.034
ENSCAFG00000015064.4	RTN3	27.415	0.873	0.034
ENSCAFG00000024967.2	ASIP	857.028	0.818	0.034
ENSCAFG00000032389.1	ERH	84.042	0.815	0.034
ENSCAFG00000017879.3	GALNT1	45.035	0.779	0.034
ENSCAFG00000002796.3	CCDC88A	28.871	0.007	0.034
ENSCAFG00000011234.3	SDC3	2.962	-0.45	0.034
ENSCAFG00000018362.3	YES1	2.476	-0.502	0.034
ENSCAFG00000015002.4	PRRX1	4.226	-0.712	0.034
ENSCAFG00000014413.4	SPOCK2	13.252	-0.8	0.034
ENSCAFG00000015945.3	ARHGEF19	0.731	-0.808	0.034
ENSCAFG00000010526.3	FIGN	3.095	-0.911	0.034
ENSCAFG00000017950.4	LMAN1L	0.969	-1.072	0.034
ENSCAFG00000010633.3	LMOD1	1.05	-1.165	0.034
ENSCAFG00000024196.2	VSTM1	3.735	2.455	0.035
ENSCAFG00000002306.3	ENSCAFT00000003616.3	2.749	2.104	0.035
ENSCAFG00000019662.3	PIGQ	6.539	1.97	0.035
ENSCAFG00000008661.3	TUBA1C	26.085	1.597	0.035
ENSCAFG00000017664.3	SLC14A1	34.594	1.163	0.035
ENSCAFG00000001209.3	CDC23	4.72	1.121	0.035
ENSCAFG00000009248.4	DGKZ	8.271	1.102	0.035
ENSCAFG00000000136.3	ENSCAFT00000000224.3	33.799	1.03	0.035
ENSCAFG00000018266.4	SLC6A14	5.793	-0.318	0.035
ENSCAFG00000003210.2	FHL3	17.427	-0.319	0.035
ENSCAFG00000008834.3	ZFYVE16	4.921	-0.338	0.035
ENSCAFG00000010563.3	GRB14	1.094	-0.569	0.035
ENSCAFG00000016026.1	AKAP5	21.203	-0.727	0.035
ENSCAFG00000023620.3	ENSCAFT00000046959.2	0.981	-1.019	0.035
ENSCAFG00000002618.2	TNNI3	3.956	-1.164	0.035
ENSCAFG00000023335.2	MMP8	10.182	3.176	0.036
ENSCAFG00000009582.3	TXNDC5	64.581	1.704	0.036
ENSCAFG00000001798.3	SLC30A9	15.666	1.243	0.036
ENSCAFG00000007030.3	ESPL1	4.365	1.166	0.036
ENSCAFG00000010780.3	STT3A	18.267	0.885	0.036
ENSCAFG00000002652.3	RPS9	1334.52	0.869	0.036
ENSCAFG00000014730.3	NOP14	25.396	0.814	0.036
ENSCAFG00000028621.1	OLFML2A	3.386	-0.518	0.036
ENSCAFG00000016918.2	GNGT2	6.184	-0.63	0.036
ENSCAFG00000029553.1	ENSCAFT00000048753.1	17.712	2.796	0.037
ENSCAFG00000011119.1	ENSCAFT00000017689.1	2.139	1.835	0.037
ENSCAFG00000007277.4	IL1RN	19.915	1.608	0.037
ENSCAFG00000015782.4	RAB8A	36.122	1.483	0.037
ENSCAFG00000003455.3	ENSCAFT00000005550.3	202.821	0.902	0.037
ENSCAFG00000011389.1	ENSCAFT00000018092.1	680.897	0.897	0.037
ENSCAFG00000003821.3	ITGB1	106.744	0.041	0.037
ENSCAFG00000014523.3	ENO2	2.9	-0.482	0.037
ENSCAFG00000015707.3	DDX11	10.986	1.484	0.038
ENSCAFG00000015000.3	TACC3	8.355	1.296	0.038
ENSCAFG00000031248.1	FAM111A	12.624	1.091	0.038
ENSCAFG00000009533.3	SSR1	25.48	1.044	0.038
ENSCAFG00000010117.3	ENSCAFT00000016072.3	676.849	0.827	0.038
ENSCAFG00000019472.3	RPS2	533.512	0.767	0.038
ENSCAFG00000017442.4	SLC27A3	13.483	-0.083	0.038
ENSCAFG00000001094.3	SMAD5	17.22	-0.206	0.038
ENSCAFG00000018436.4	SREBF1	3.911	-0.292	0.038
ENSCAFG00000004186.4	ENSCAFT00000006737.4	15.256	-0.378	0.038
ENSCAFG00000017027.2	SLIT3	0.562	-0.509	0.038
ENSCAFG00000023358.2	SLC22A3	0.225	-0.972	0.038
ENSCAFG00000008584.3	CXCL10	18.78	2.523	0.039
ENSCAFG00000010189.3	CUEDC2	3.279	2.303	0.039
ENSCAFG00000002244.3	SRP72	39.022	0.879	0.039
ENSCAFG00000016430.4	LMAN2	90.088	0.8	0.039
ENSCAFG00000028601.1	ENSCAFT00000047998.1	6.931	-0.225	0.039
ENSCAFG00000008487.3	PDE3B	50.493	-0.26	0.039
ENSCAFG00000008919.3	RASGEF1B	5.088	-0.442	0.039
ENSCAFG00000018478.4	MYOM1	0.859	-0.501	0.039
ENSCAFG00000016837.4	SKAP1	8.032	-0.666	0.039
ENSCAFG00000005395.4	GDPD5	1.542	-0.668	0.039
ENSCAFG00000014777.3	RCOR2	0.561	-0.715	0.039
ENSCAFG00000013102.4	GLUL	6.959	-0.765	0.039
ENSCAFG00000029353.1	LNP1	1.403	-0.865	0.039
ENSCAFG00000015768.4	PADI4	18.207	1.801	0.04
ENSCAFG00000002917.3	AEBP1	4.307	1.706	0.04
ENSCAFG00000015961.4	UBE2K	168.675	1.285	0.04
ENSCAFG00000002937.5	POLD1	3.526	1.171	0.04
ENSCAFG00000005561.3	IPO5	10.149	1.015	0.04
ENSCAFG00000006693.3	ENSCAFT00000030343.3	77.38	1.014	0.04
ENSCAFG00000010408.4	MLEC	61.775	0.979	0.04
ENSCAFG00000010710.3	KCTD3	13.841	0.943	0.04
ENSCAFG00000031979.2	PRKG1	8.917	-0.094	0.04
ENSCAFG00000012614.3	KCNK2	11.441	-0.104	0.04
ENSCAFG00000019717.3	BSG	42.149	-0.159	0.04
ENSCAFG00000028825.1	ENSCAFT00000047313.1	105.73	-0.36	0.04
ENSCAFG00000018622.4	DAB2	23.155	-0.376	0.04
ENSCAFG00000015765.3	TFE3	5.367	-0.391	0.04
ENSCAFG00000011158.4	CFAP46	0.429	-0.453	0.04
ENSCAFG00000015887.4	APBB2	1.982	-0.745	0.04
ENSCAFG00000017116.3	IFT43	8.211	-0.762	0.04
ENSCAFG00000016445.4	ENSCAFT00000026063.4	13.6	-0.929	0.04
ENSCAFG00000003752.2	ENSCAFT00000006030.2	0.68	-1.123	0.04
ENSCAFG00000013178.4	OLA1	24.181	1.048	0.041
ENSCAFG00000001344.3	NAA35	21.49	1.012	0.041
ENSCAFG00000014992.3	FMO3	5.096	-0.249	0.041
ENSCAFG00000010101.4	KIF13A	3.687	-0.377	0.041
ENSCAFG00000007149.4	FBLN7	0.128	-0.499	0.041
ENSCAFG00000013283.3	CHRNA1	1.56	-1.173	0.041
ENSCAFG00000001845.3	DBF4	20.128	1.365	0.042
ENSCAFG00000003615.4	ZYX	63.602	1.172	0.042
ENSCAFG00000000381.5	TBC1D9B	4.224	-0.346	0.042
ENSCAFG00000014752.4	TFPI	21.116	-0.392	0.042
ENSCAFG00000020053.3	PALMD	2.657	-0.711	0.042
ENSCAFG00000017106.3	GCDH	5.587	1.045	0.043
ENSCAFG00000006598.3	MCM4	12.474	1.035	0.043
ENSCAFG00000017510.3	PSMC1	120.486	0.947	0.043
ENSCAFG00000011384.4	DDX27	35.53	0.865	0.043
ENSCAFG00000008557.4	APP	38.713	-0.282	0.043
ENSCAFG00000011023.3	C27H12orf71	3.647	-0.362	0.043
ENSCAFG00000006504.4	UPF3A	11.418	-0.374	0.043
ENSCAFG00000011960.3	C4H1orf198	4.153	-0.394	0.043
ENSCAFG00000007095.3	FXYD1	69.347	-0.566	0.043
ENSCAFG00000011505.3	ENSCAFT00000018259.3	10.953	3.822	0.044
ENSCAFG00000017523.3	PAQR5	7.945	2.371	0.044
ENSCAFG00000009414.4	CHAC1	4.397	1.563	0.044
ENSCAFG00000031174.1	PPBP	23.031	1.391	0.044
ENSCAFG00000010642.3	CSTB	4229.43	1.287	0.044
ENSCAFG00000002126.3	CENPQ	5.707	1.235	0.044
ENSCAFG00000009795.4	ATP1A1	25.056	0.814	0.044
ENSCAFG00000013026.3	HEATR5A	3.197	-0.171	0.044
ENSCAFG00000009375.3	WDSUB1	3.138	-0.46	0.044
ENSCAFG00000019293.3	TLE2	4.635	-0.629	0.044
ENSCAFG00000015396.3	ENSCAFT00000024420.3	23.061	1.153	0.045
ENSCAFG00000031129.1	ENSCAFT00000043992.1	13.941	0.832	0.045
ENSCAFG00000001214.3	RPS10	3785.12	0.779	0.045
ENSCAFG00000030110.1	POMK	4.221	-0.217	0.045
ENSCAFG00000032023.1	SRD5A2	4.76	-0.265	0.045
ENSCAFG00000024936.3	MTUS2	0.392	-0.311	0.045
ENSCAFG00000029046.1	ENSCAFT00000045562.1	11.43	-0.342	0.045
ENSCAFG00000003897.3	RNF11	6.673	-1.155	0.045
ENSCAFG00000029502.1	ENSCAFT00000029308.2	113.128	7.095	0.046
ENSCAFG00000001138.3	ENSCAFT00000001763.3	9.436	2.543	0.046
ENSCAFG00000004730.3	PLAUR	3.945	1.751	0.046
ENSCAFG00000005348.3	EHD3	10.992	1.604	0.046
ENSCAFG00000014346.3	C1S	42.841	1.397	0.046
ENSCAFG00000004046.3	LIG1	6.069	1.254	0.046
ENSCAFG00000013918.3	SLC2A3	1.434	1.232	0.046
ENSCAFG00000011957.3	LSS	1.695	1.224	0.046
ENSCAFG00000004341.4	SETDB2	14.343	1.192	0.046
ENSCAFG00000013511.3	REXO2	19.77	1.109	0.046
ENSCAFG00000010503.4	TM2D3	51.223	1.039	0.046
ENSCAFG00000004517.4	NASP	26.463	1.03	0.046
ENSCAFG00000004163.3	HMCES	5.094	0.86	0.046
ENSCAFG00000008998.3	CFAP298	133.209	0.023	0.046
ENSCAFG00000016208.4	TBC1D1	9.475	-0.07	0.046
ENSCAFG00000017228.4	ENSCAFT00000027285.4	26.389	-0.176	0.046
ENSCAFG00000006294.4	STARD13	4.98	-0.194	0.046
ENSCAFG00000030221.1	ENSCAFT00000048836.1	1.404	-0.304	0.046
ENSCAFG00000003528.4	TCAF1	2.323	-0.343	0.046
ENSCAFG00000000405.3	PLEKHG1	4.87	-0.666	0.046
ENSCAFG00000004143.3	GATA2	3.645	-0.701	0.046
ENSCAFG00000003280.3	RSPO1	1.098	-1.15	0.046
ENSCAFG00000023928.2	CCL8	4.078	2.559	0.047
ENSCAFG00000032736.1	SVIP	9921.98	1.959	0.047
ENSCAFG00000011861.3	FANCB	5.179	1.406	0.047
ENSCAFG00000005405.3	SEC23B	1.246	1.164	0.047
ENSCAFG00000007812.3	SMN	18.589	0.918	0.047
ENSCAFG00000011698.3	TLR7	7.782	-0.195	0.047
ENSCAFG00000032209.1	TYW3	4.06	-0.346	0.047
ENSCAFG00000020252.3	NQO1	4.307	2.625	0.048
ENSCAFG00000012140.3	PRC1	19.584	2.12	0.048
ENSCAFG00000010838.2	TRIP13	6.243	1.349	0.048
ENSCAFG00000025598.2	HUS1	29.281	1.309	0.048
ENSCAFG00000014885.3	ENSCAFT00000023660.3	4.396	1.304	0.048
ENSCAFG00000001760.3	LSM3	537.066	1.071	0.048
ENSCAFG00000005969.3	TRMT6	5.075	0.896	0.048
ENSCAFG00000003729.3	SMC6	63.138	0.884	0.048
ENSCAFG00000002387.4	COX5B	709.746	0.81	0.048
ENSCAFG00000014639.3	C1QC	816.298	-0.281	0.048
ENSCAFG00000028817.1	CFD	5.429	-0.545	0.048
ENSCAFG00000009276.3	SERPINB1	125.738	1.904	0.049
ENSCAFG00000024758.3	ADAMTS5	2.401	1.471	0.049
ENSCAFG00000012967.3	PCYT1A	50.711	1.194	0.049
ENSCAFG00000031249.1	ENSCAFT00000048041.1	2020.11	-0.209	0.049
ENSCAFG00000014103.3	SESTD1	1.754	-0.444	0.049
ENSCAFG00000006996.4	CCDC92	3.827	-0.522	0.049
ENSCAFG00000011908.5	SHTN1	23.227	-0.752	0.049
ENSCAFG00000002833.3	ENSCAFT00000004526.3	73.717	1.129	0.05
ENSCAFG00000015041.3	DDOST	76.517	1.055	0.05
ENSCAFG00000004586.3	RSU1	19.243	1.018	0.05
ENSCAFG00000002897.3	CBX3	266.155	1.001	0.05
ENSCAFG00000012707.3	PSMB4	100.219	0.877	0.05
ENSCAFG00000008385.3	ENSCAFT00000013331.3	184.243	-0.049	0.05
ENSCAFG00000032493.1	HIC2	3.541	-0.204	0.05
ENSCAFG00000013576.4	HTR3B	17.55	-0.23	0.05
ENSCAFG00000009840.3	FAM13A	3.305	-0.502	0.05
ENSCAFG00000007807.4	STOX2	2.428	-0.714	0.05
